# Supplementary material for: Recombination, meiotic expression and human codon usage
Source: eLife journal article supplement (doi:10.7554/elife.27344), 2017-08-15
Supplement: supp [file elife-27344-supp-v1.zip]

Archive with 8 entries (8 files):
- elife_poa_e27344_Figure_6_Supplement_1.pdf
- elife_poa_e27344_Figure_2_figure_Supplement_1.pdf
- elife_poa_e27344_Figure_3_figure_Supplement_1.pdf
- elife_poa_e27344_Figure_4_Supplement_1.pdf
- elife_poa_e27344_Figure_3_figure_Supplement_2.pdf
- elife_poa_e27344_Figure_3_figure_Supplement_3.pdf
- elife_poa_e27344_Figure_4_Supplement_2.pdf
- elife_poa_e27344_Transparent_Reporting_File.pdf
