# Supplementary figures and images for: Recombination, meiotic expression and human codon usage
Source: eLife journal article supplement (doi:10.7554/elife.27344), 2017-08-15

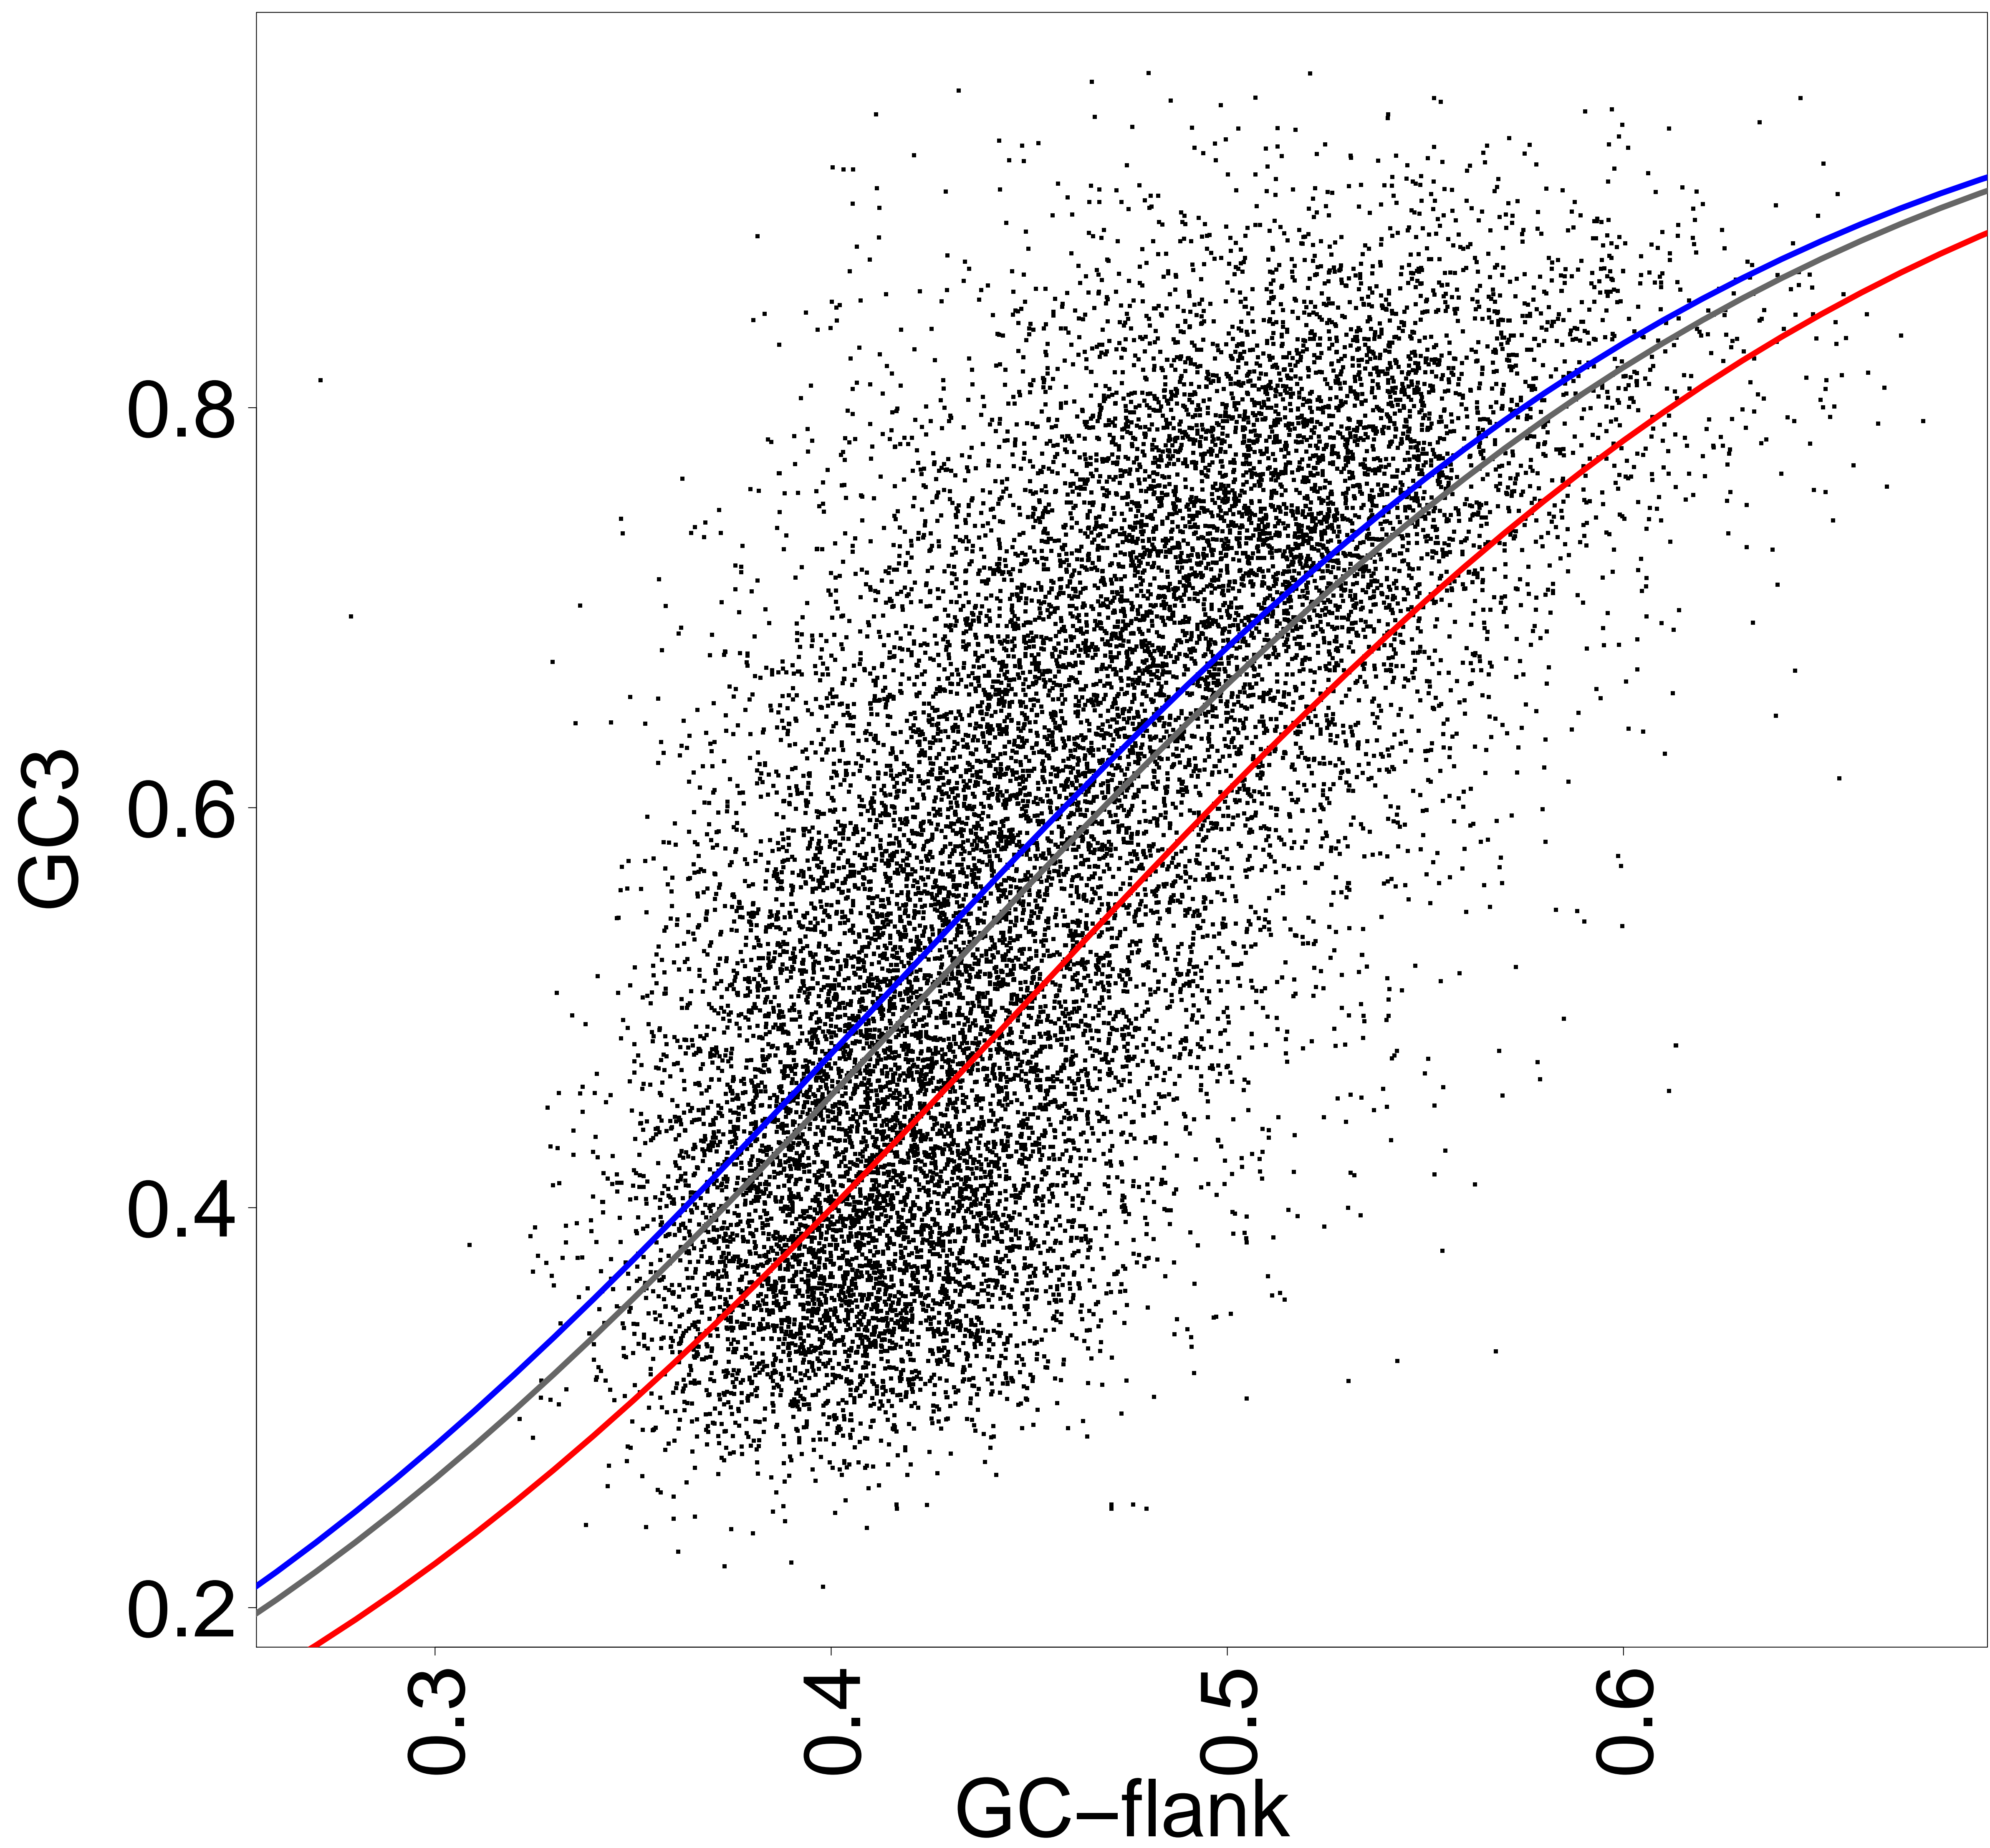

Supplement: supp [file elife-27344-supp-v1.zip]

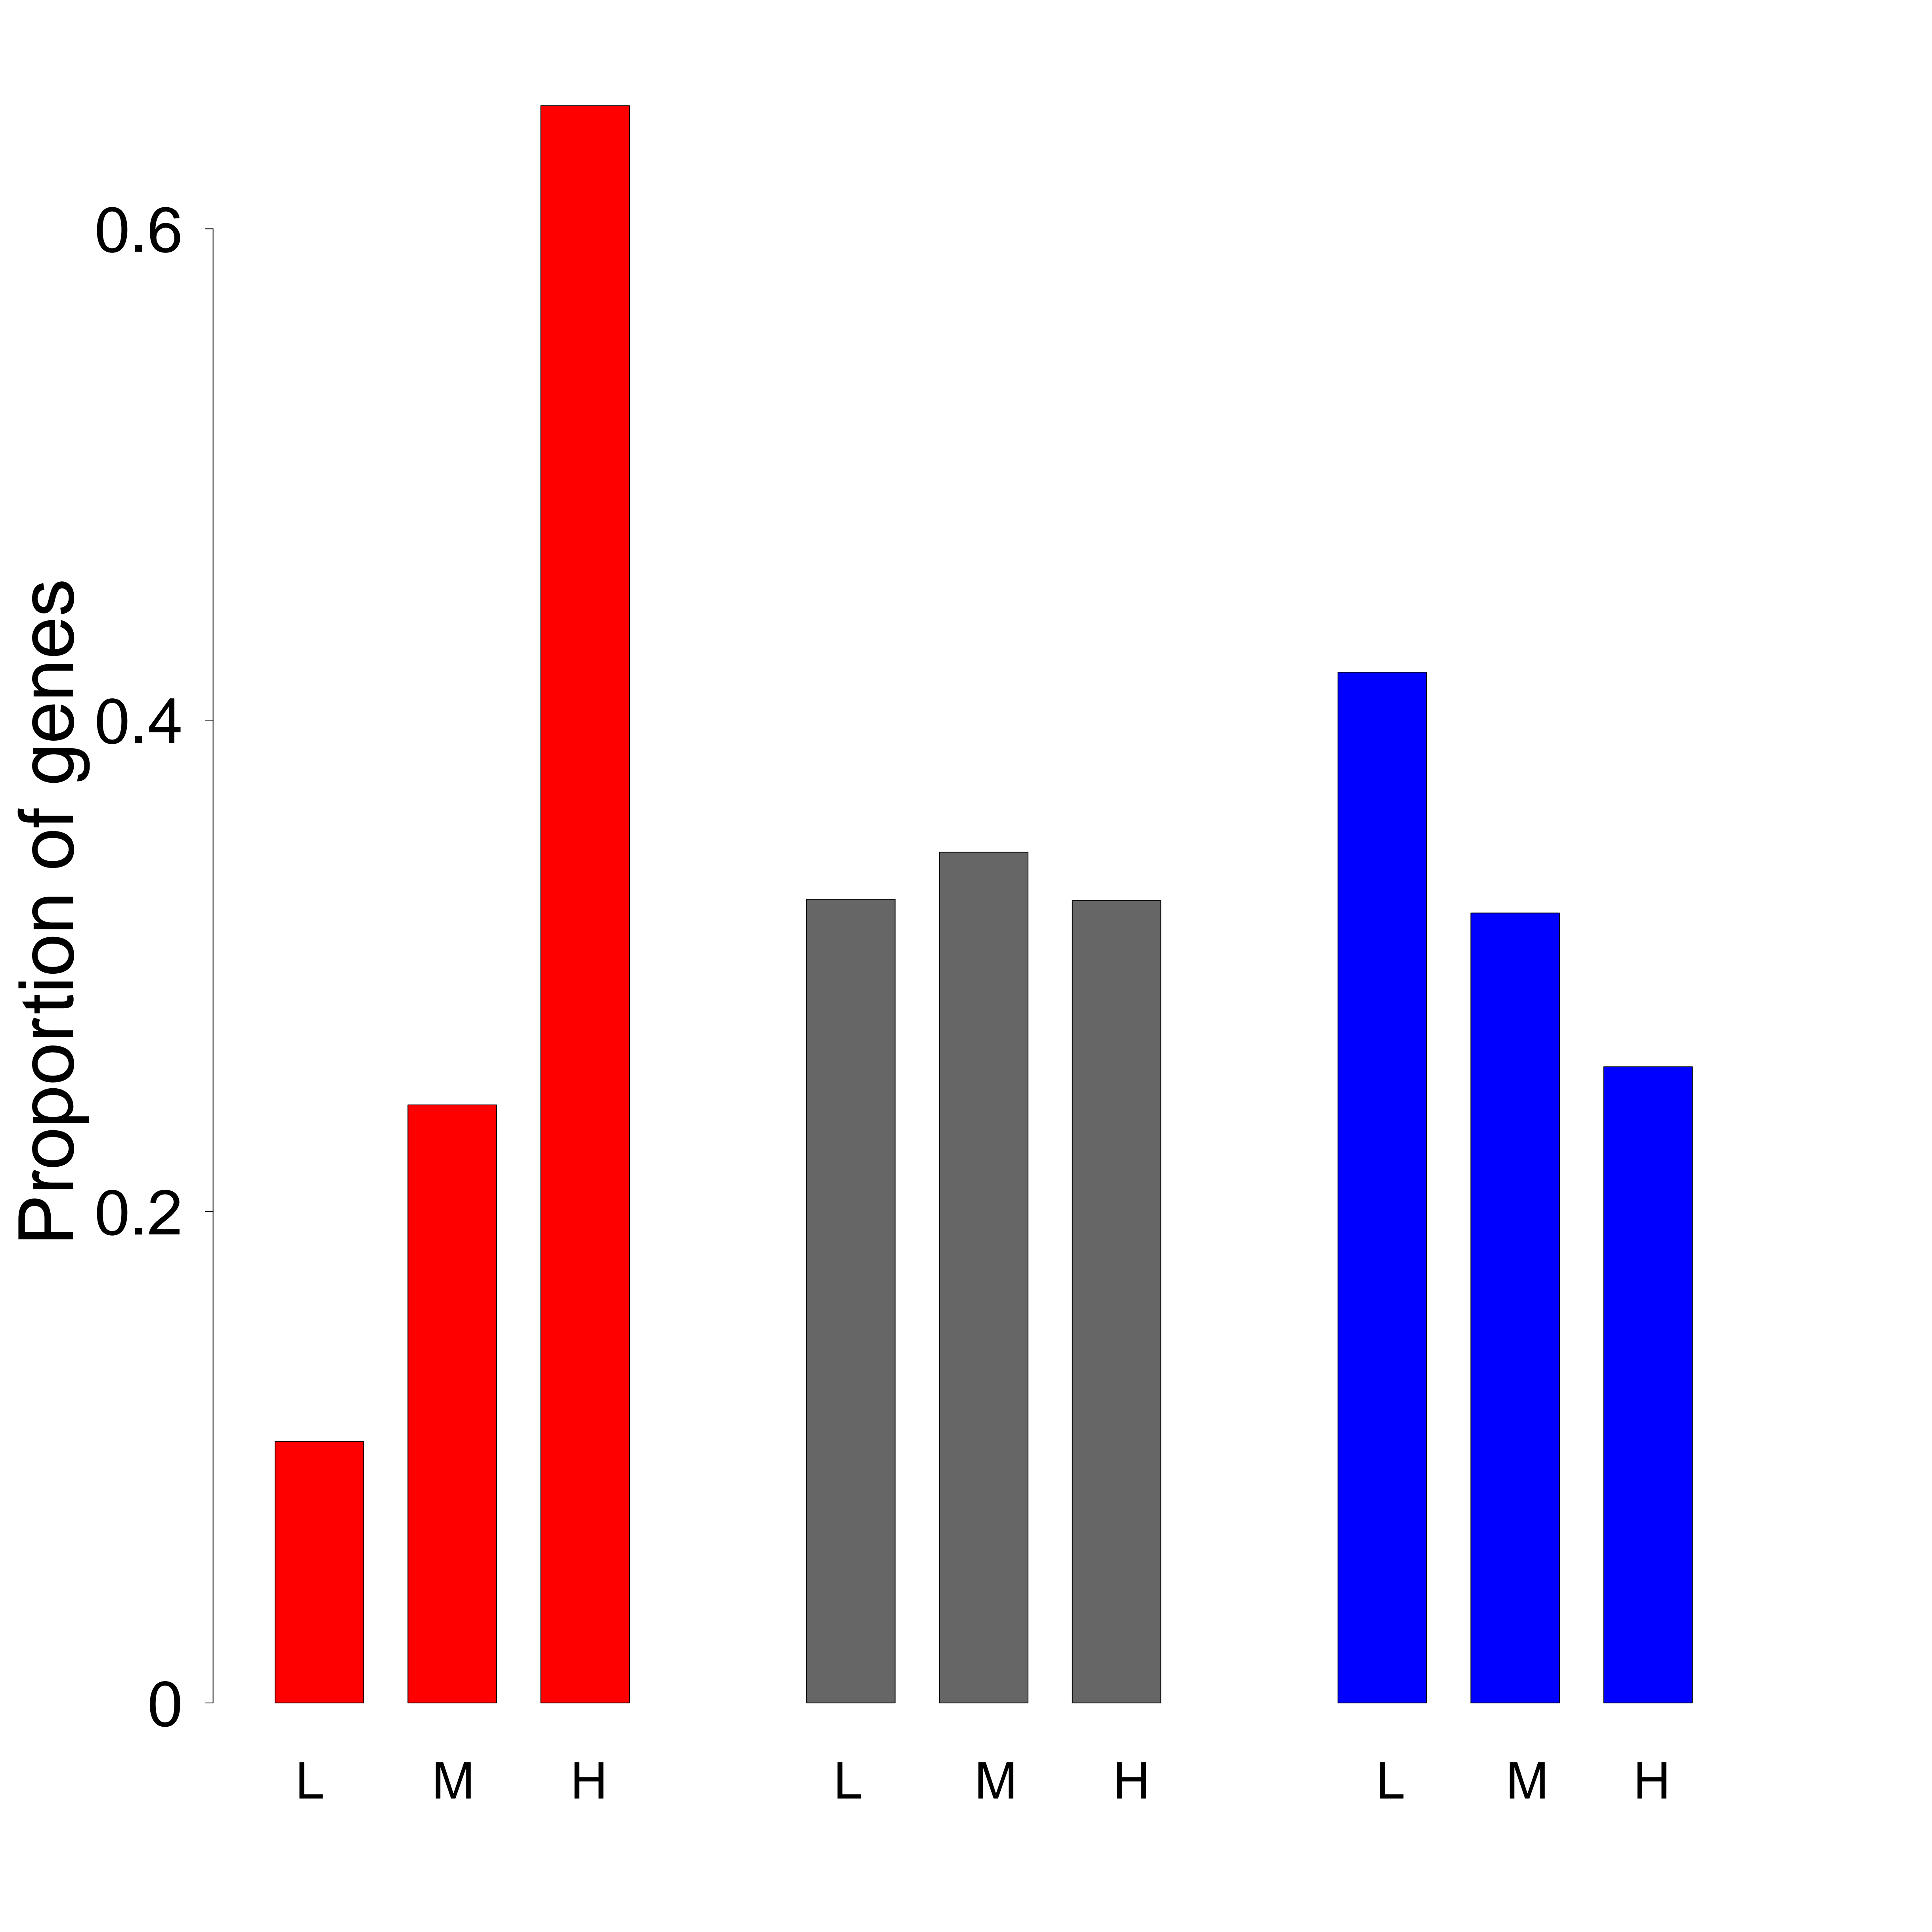

Supplement: supp [file elife-27344-supp-v1.zip]

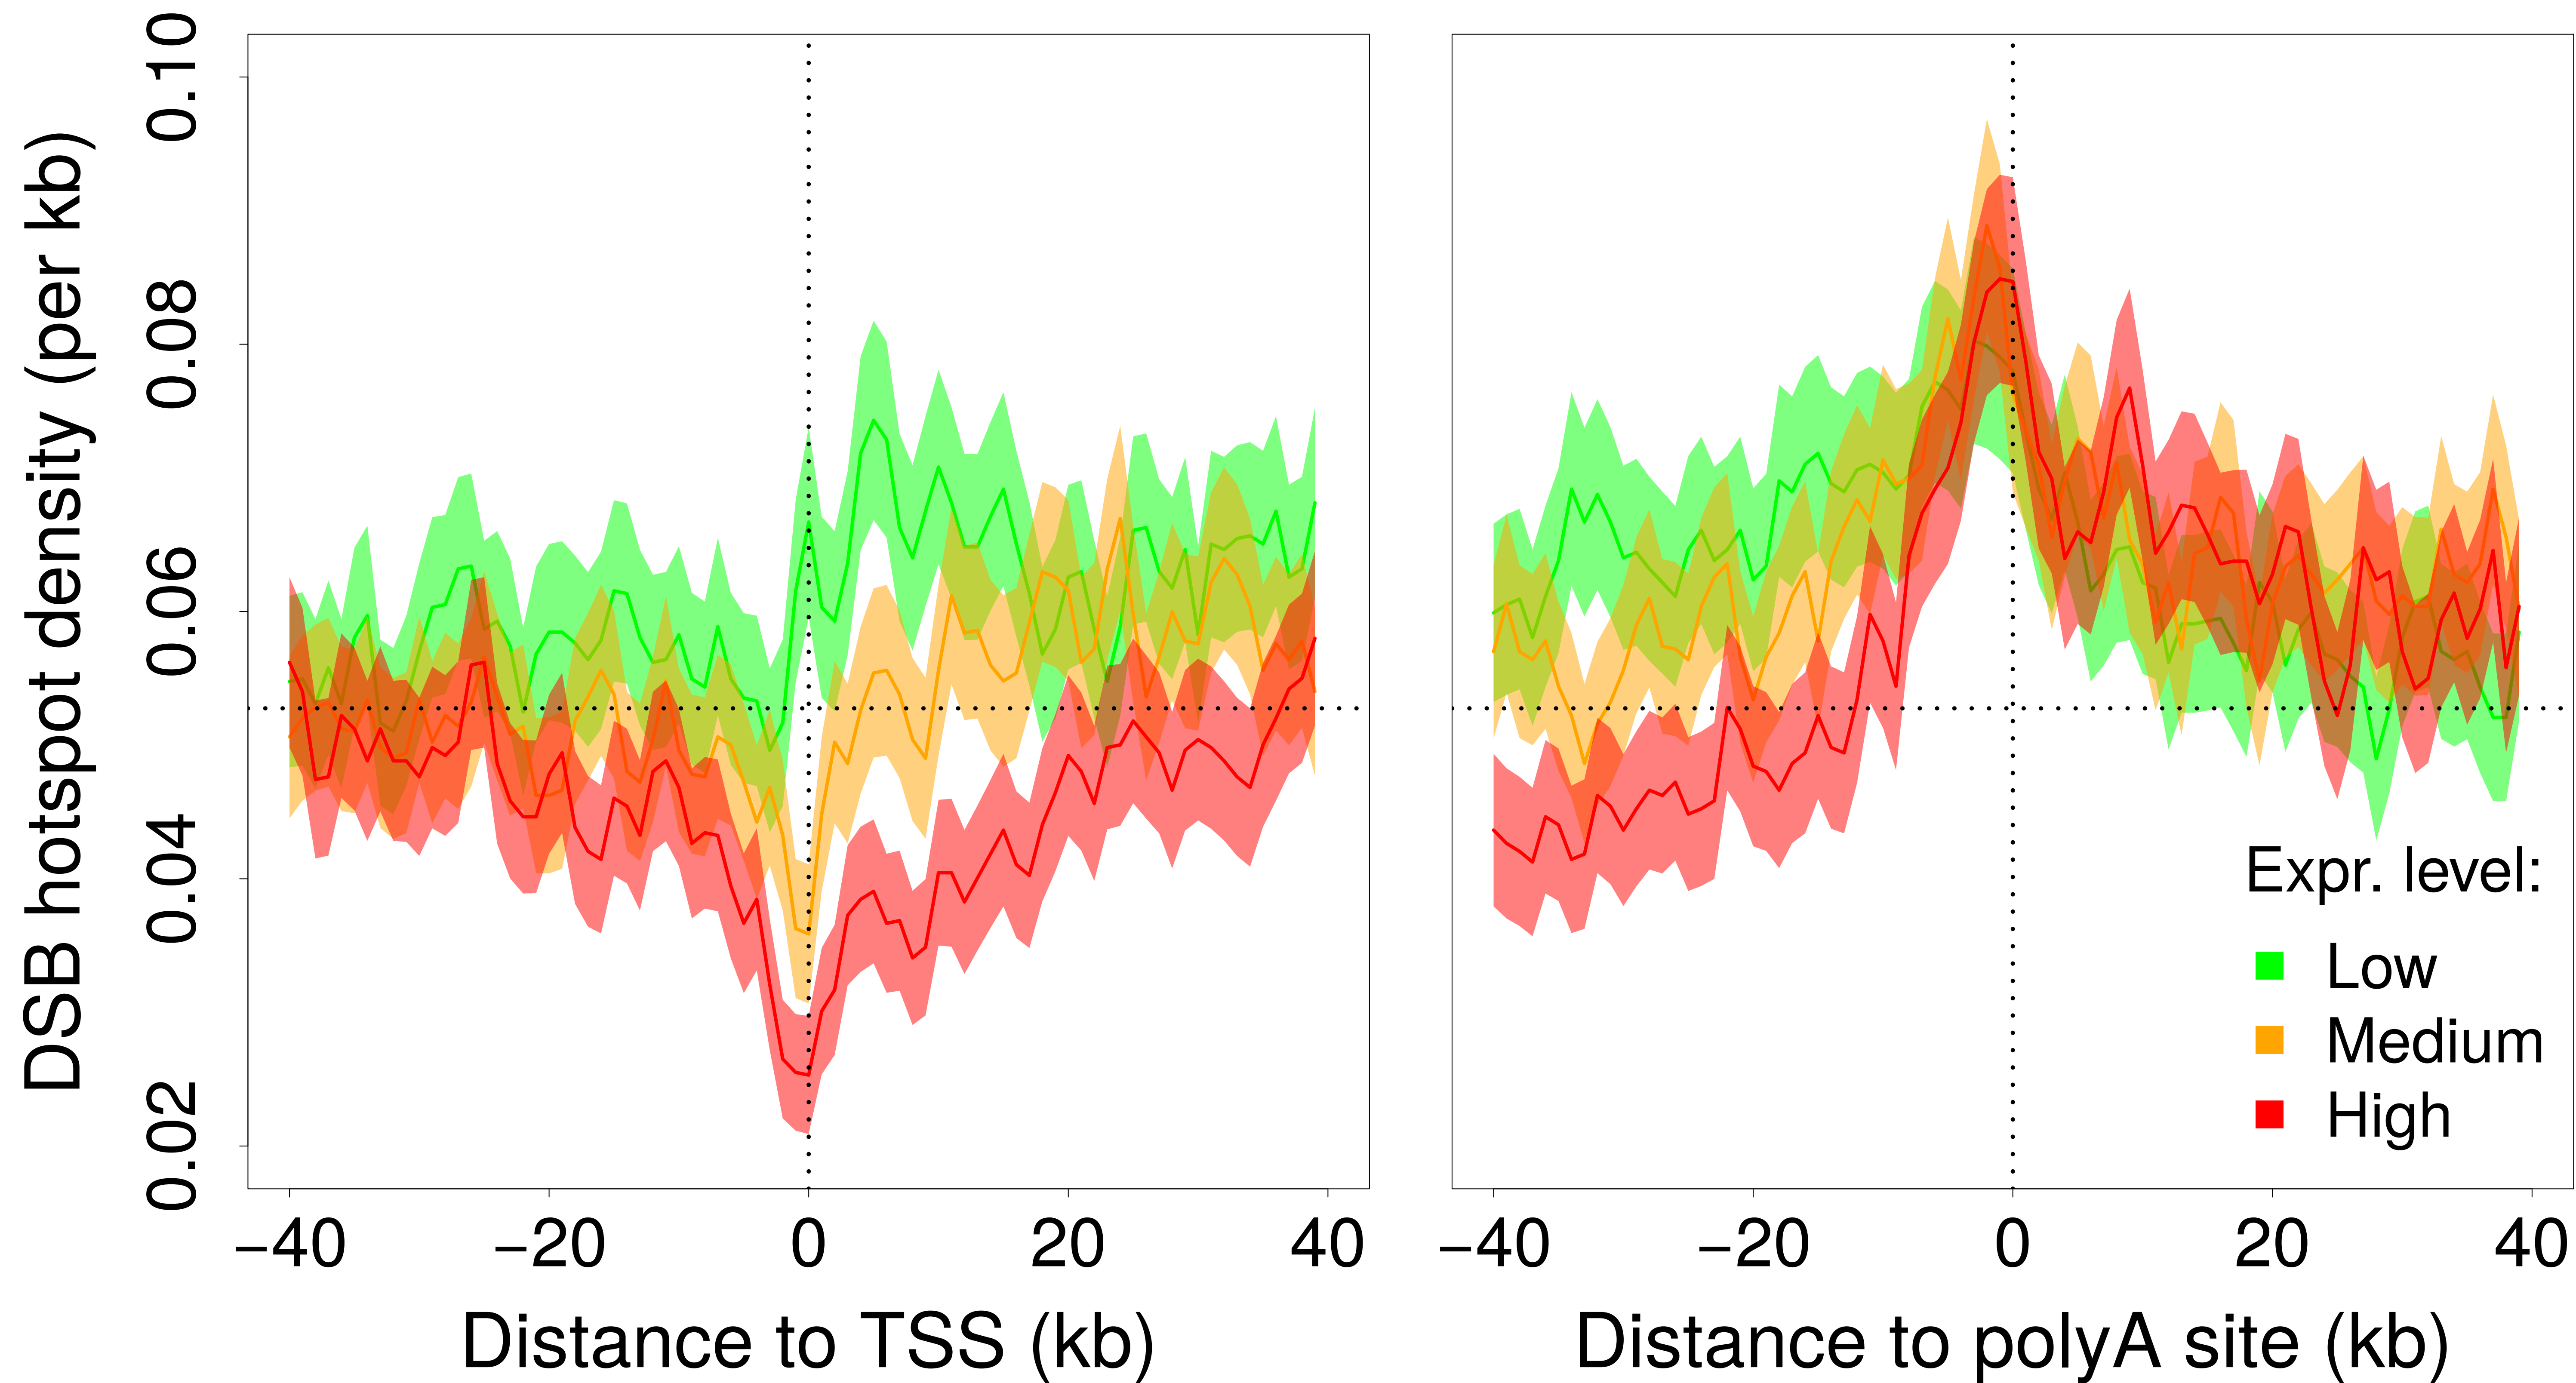

Supplement: supp [file elife-27344-supp-v1.zip]

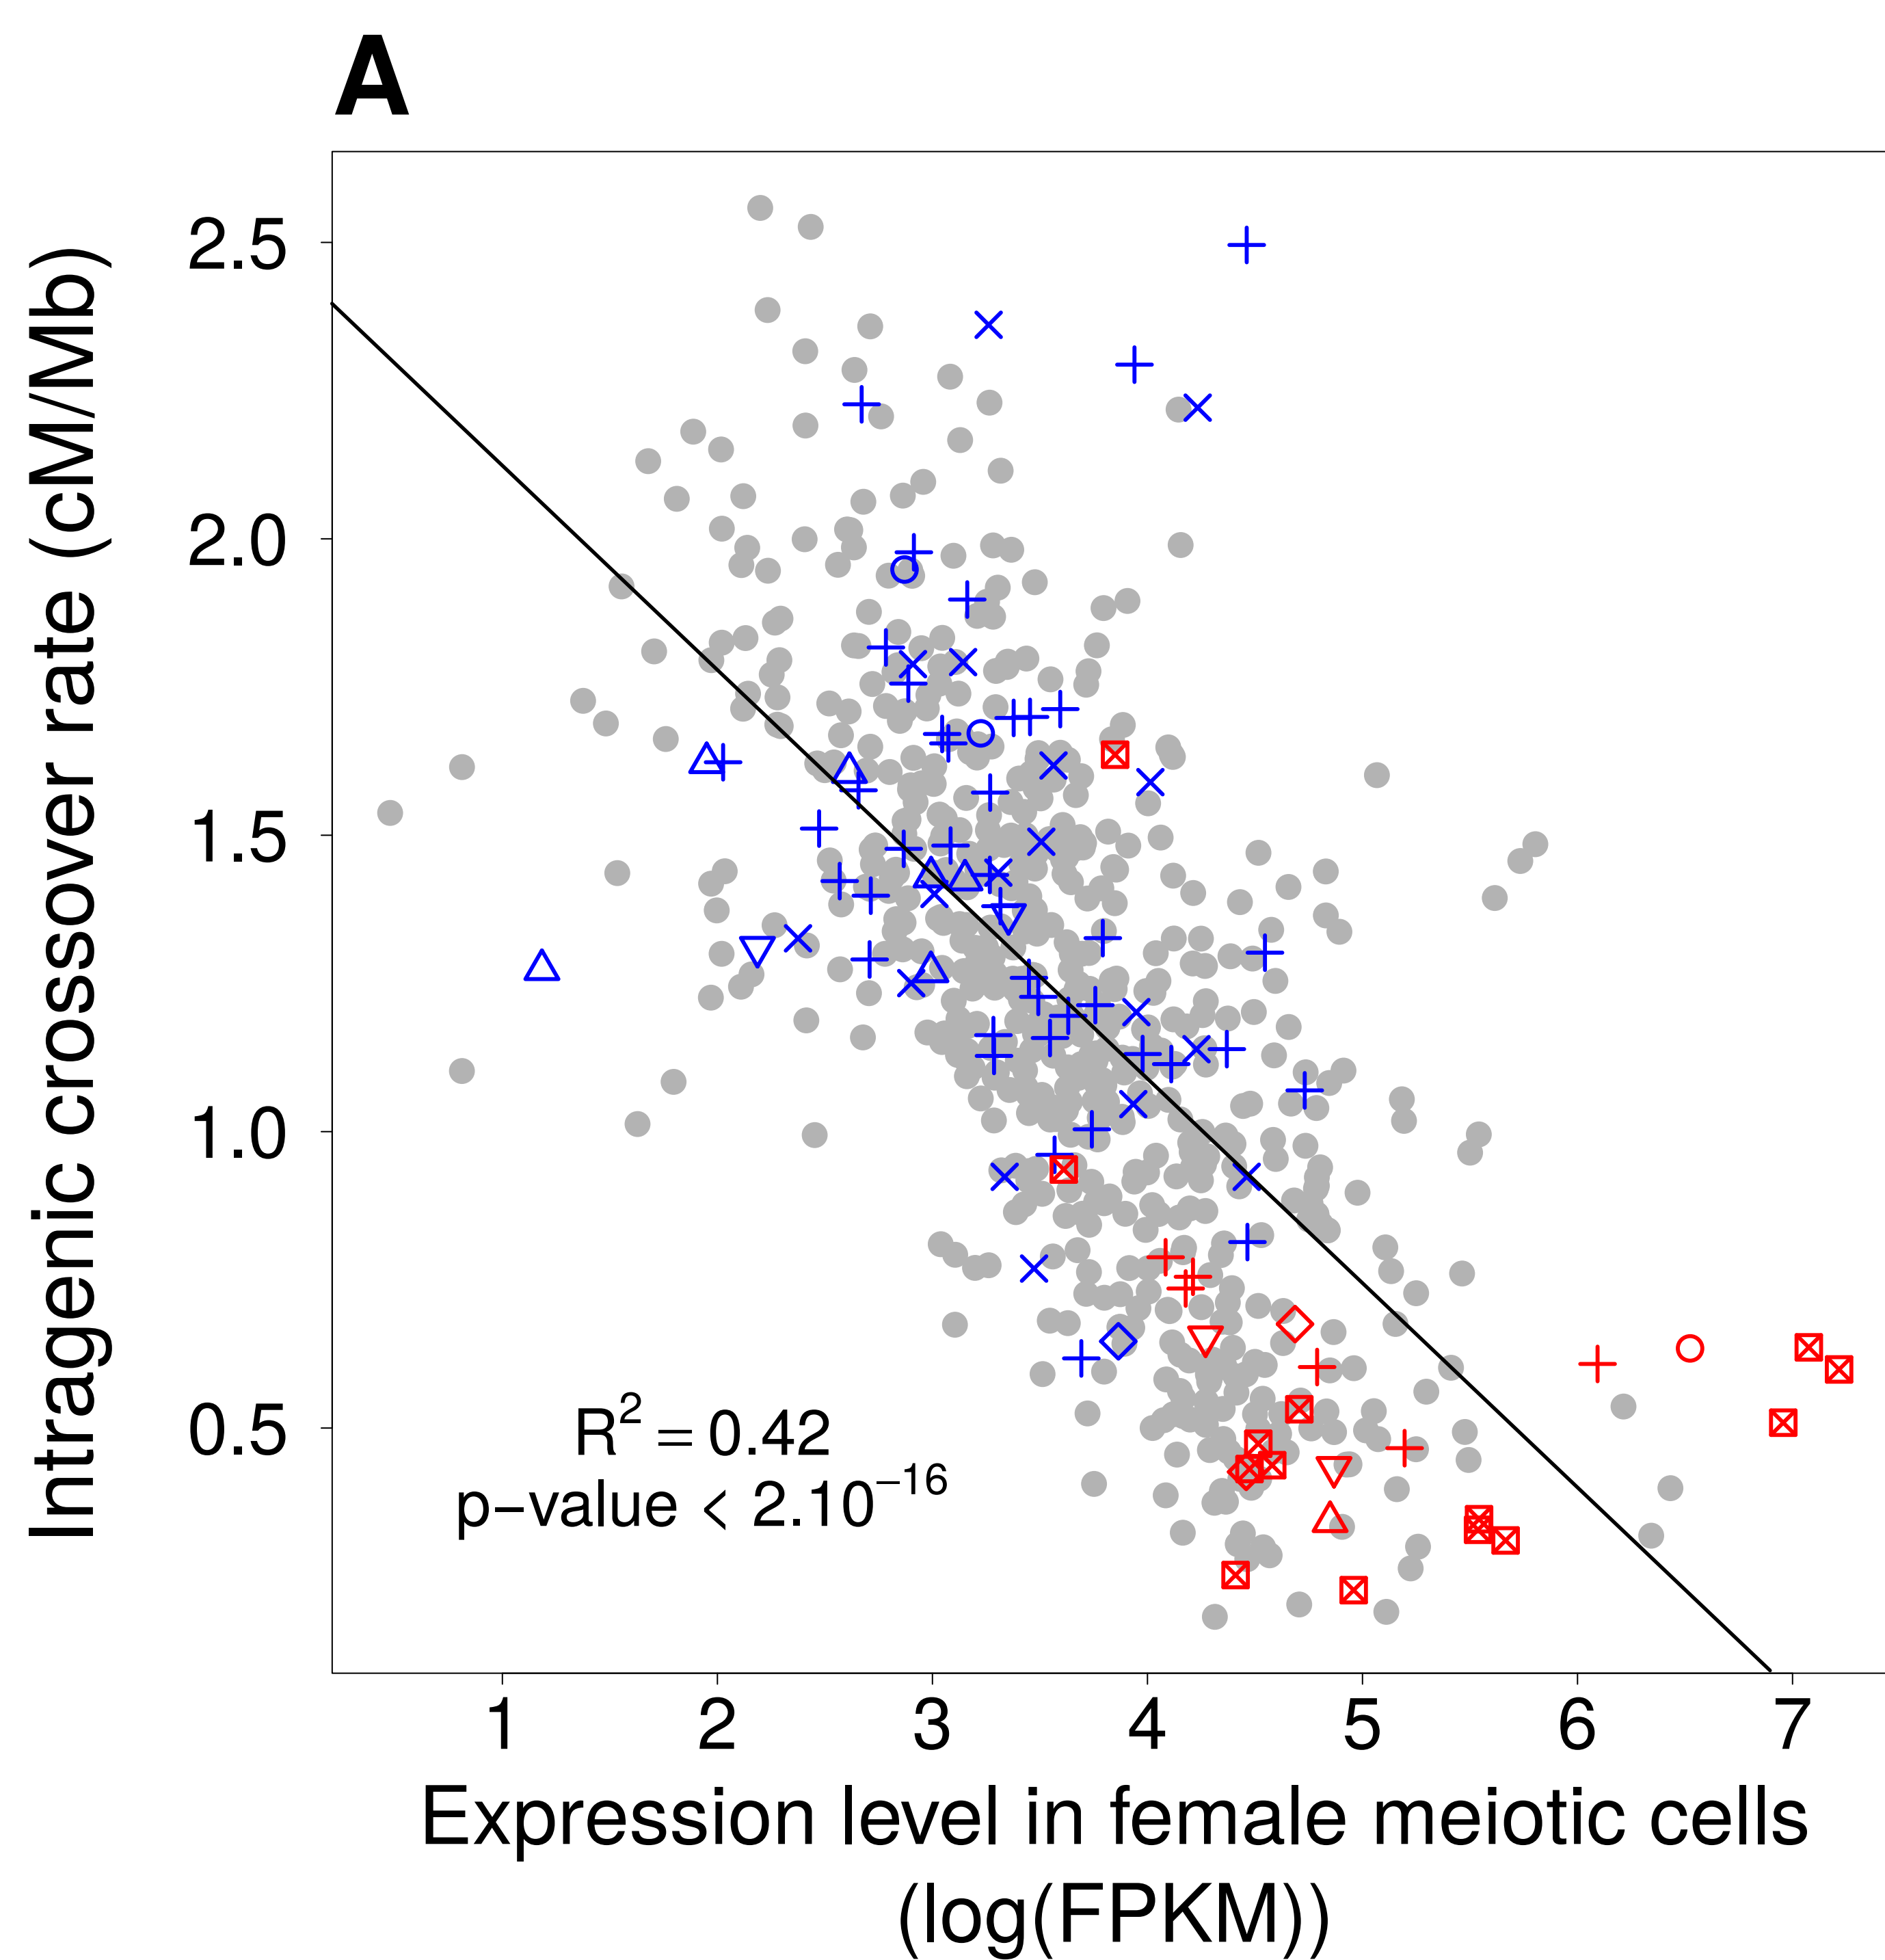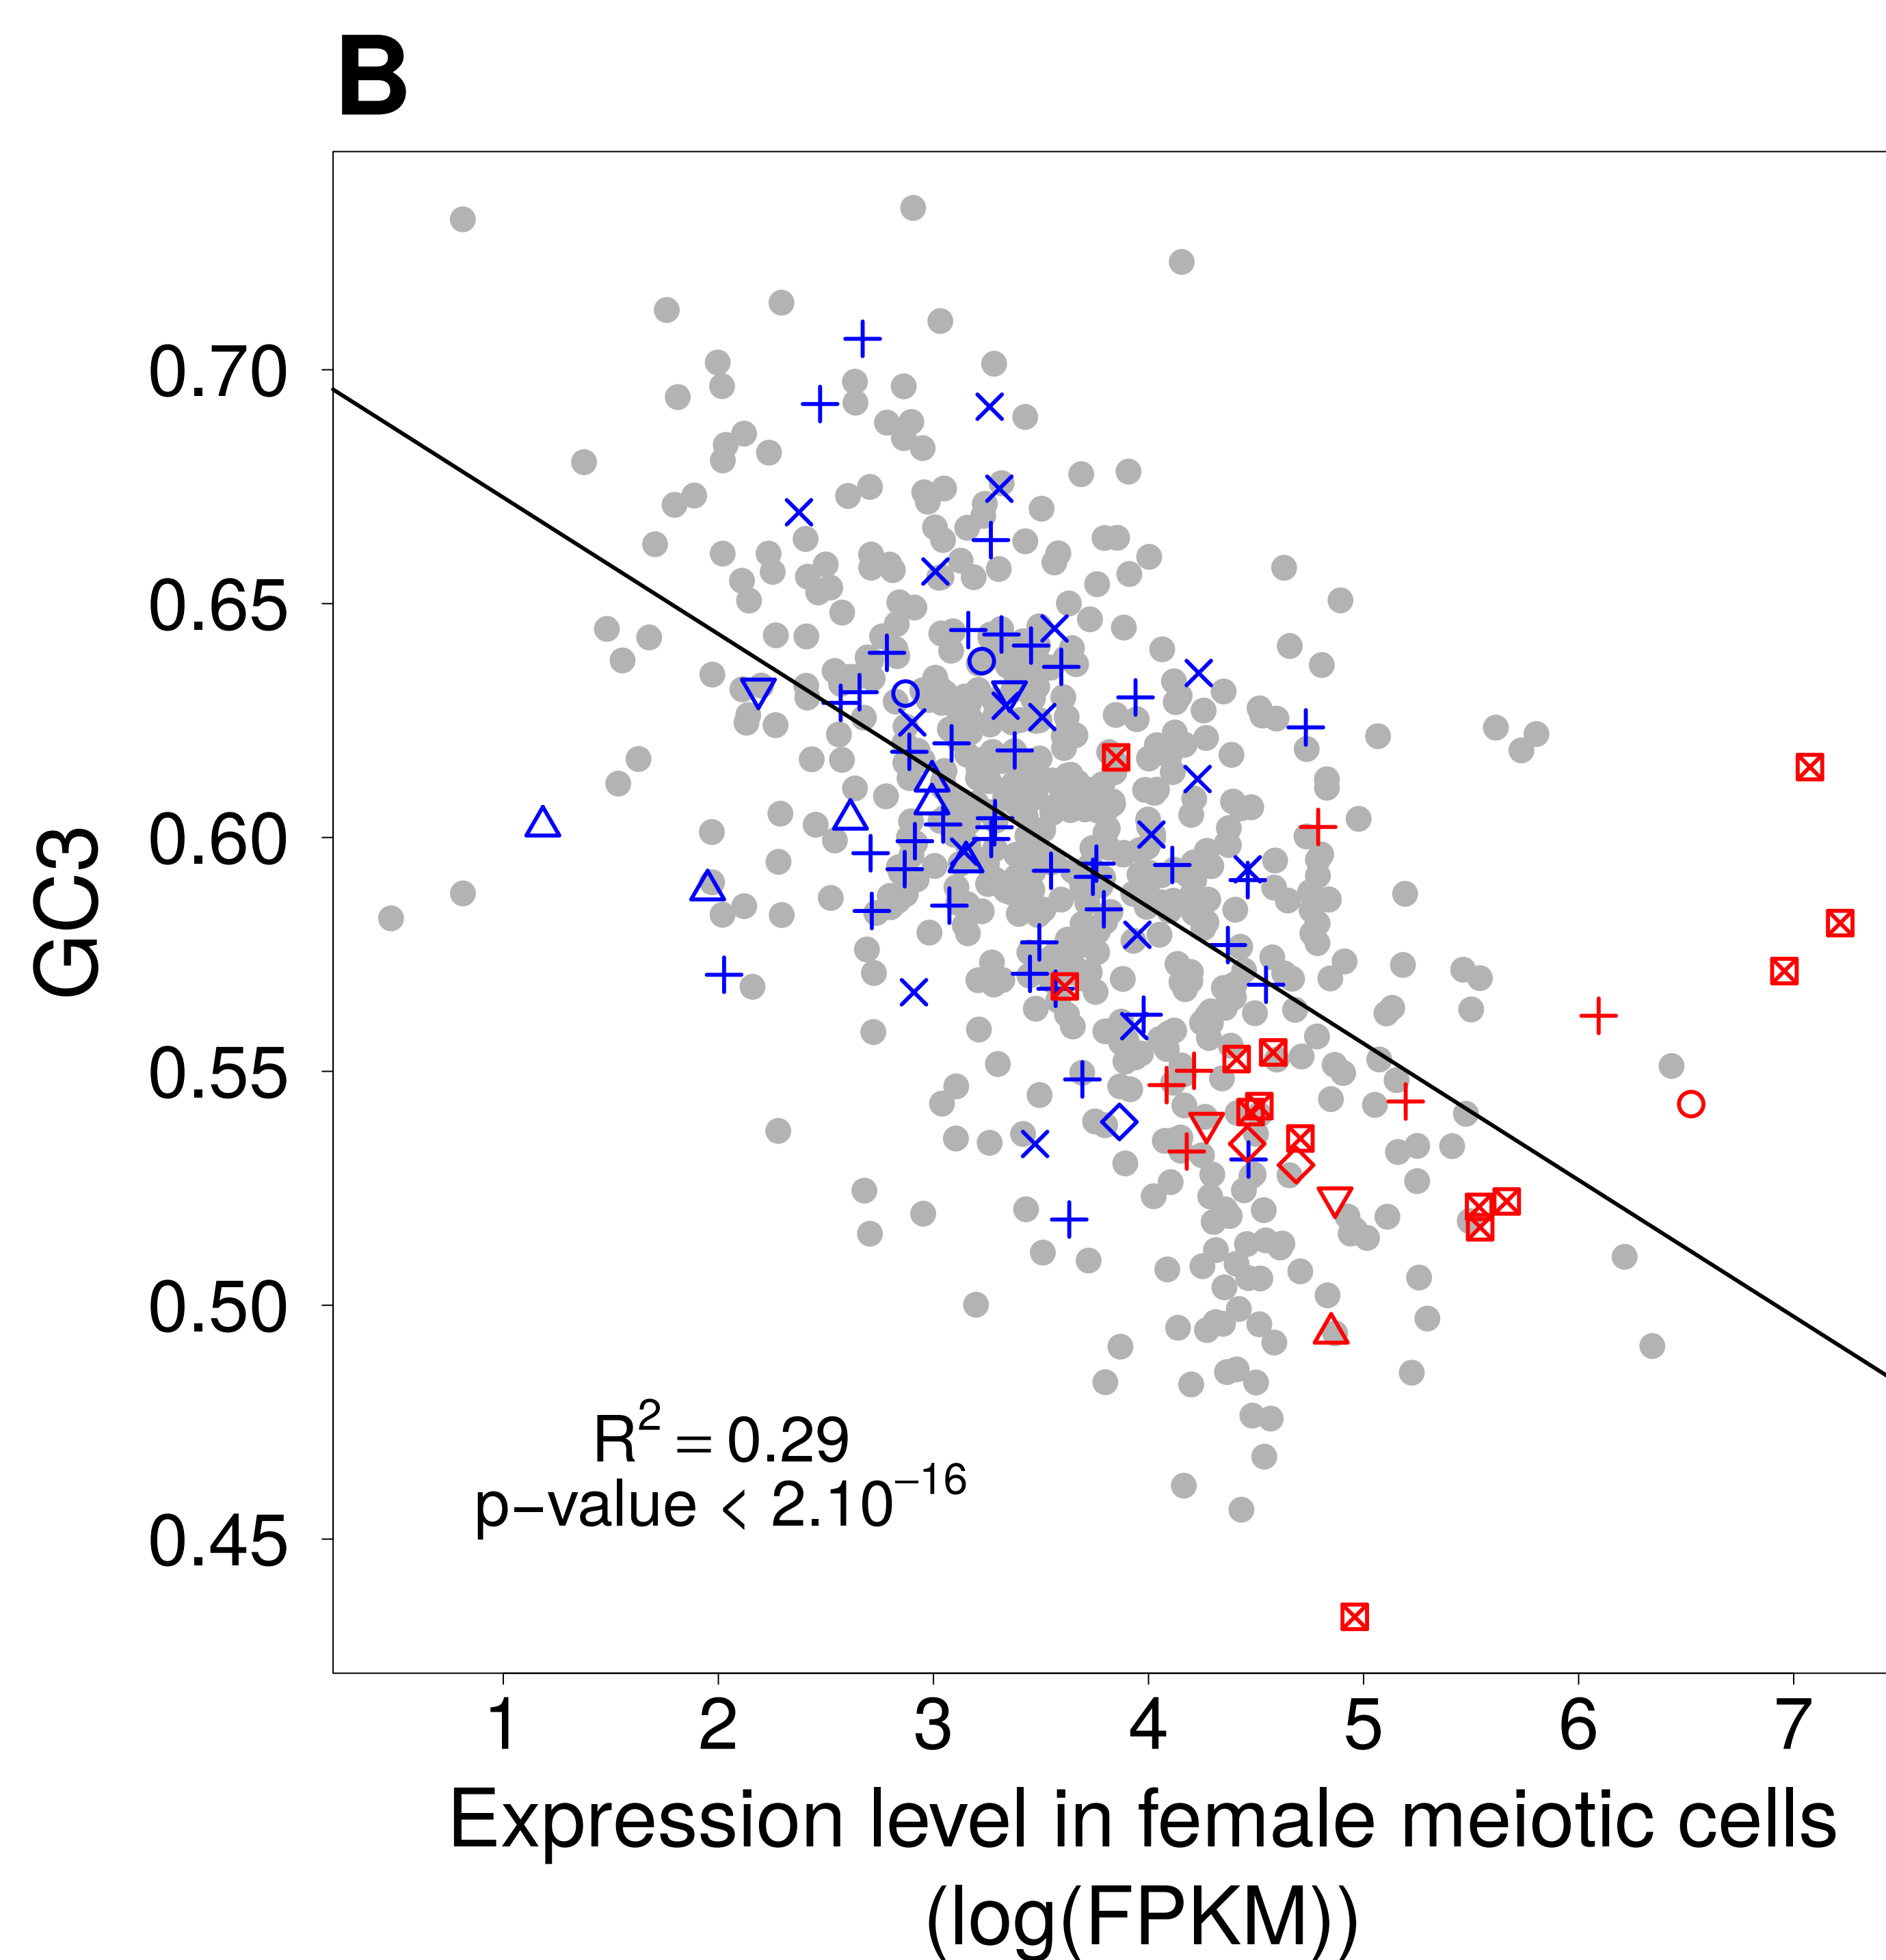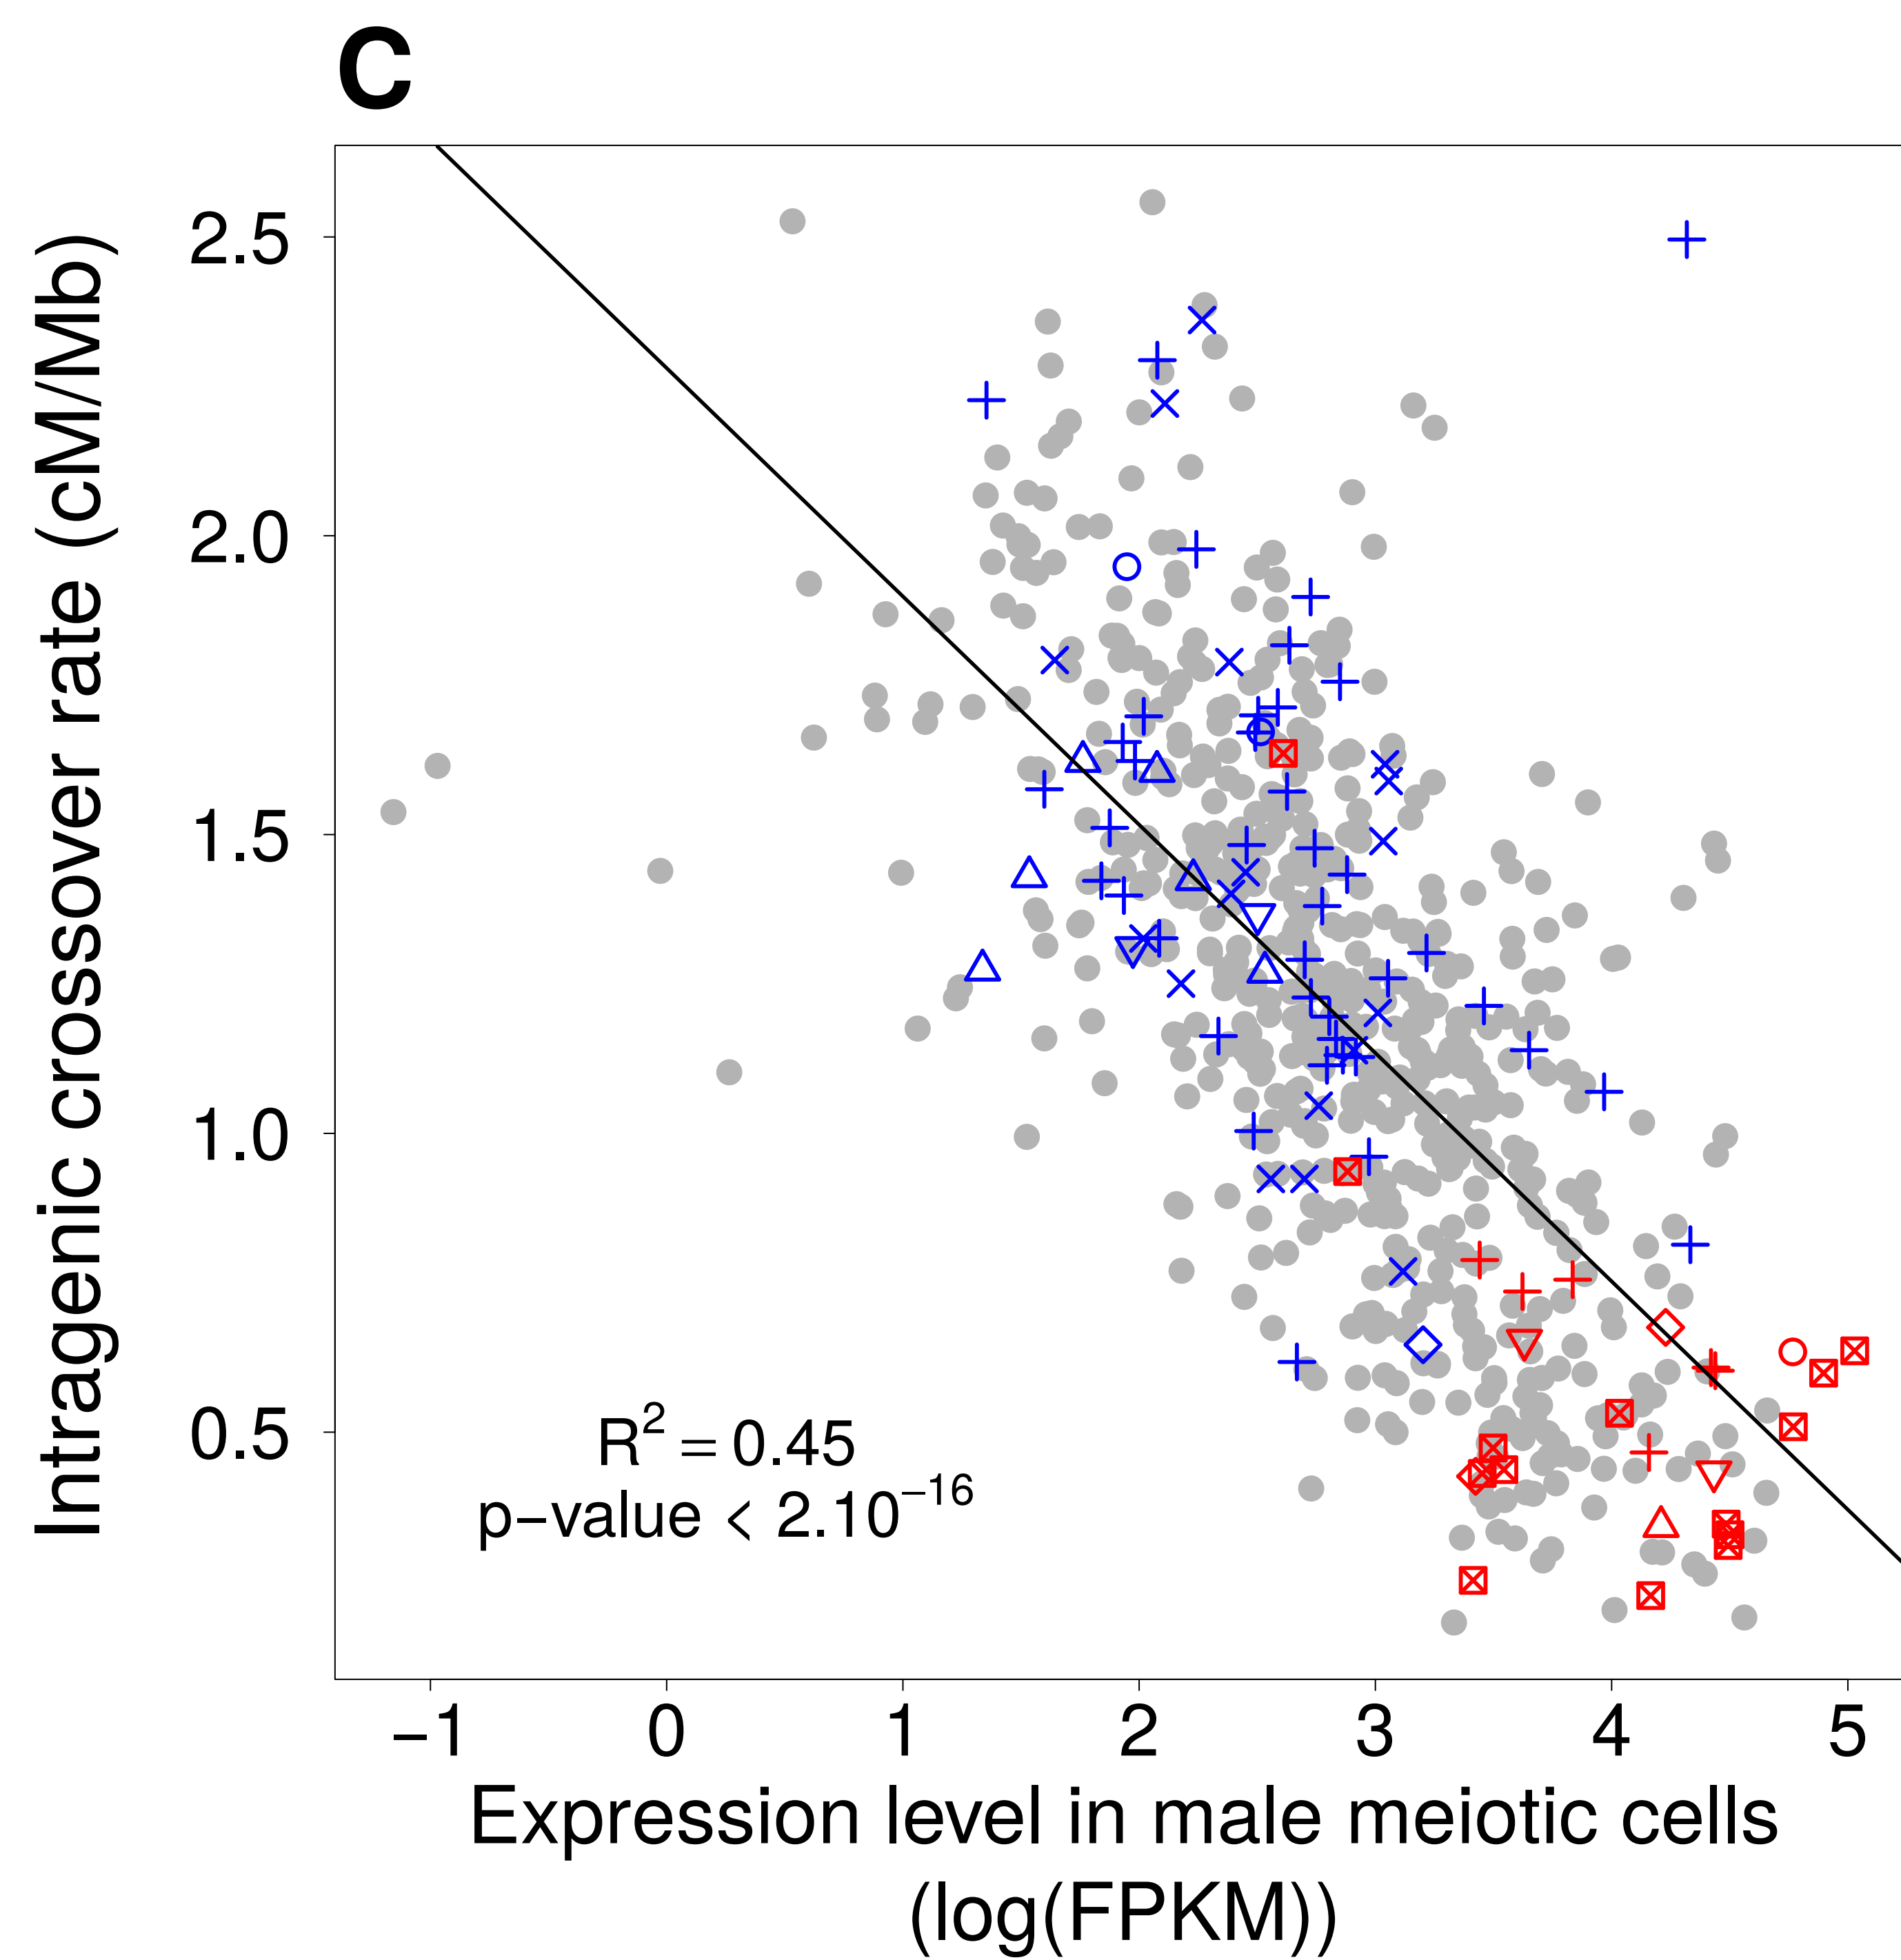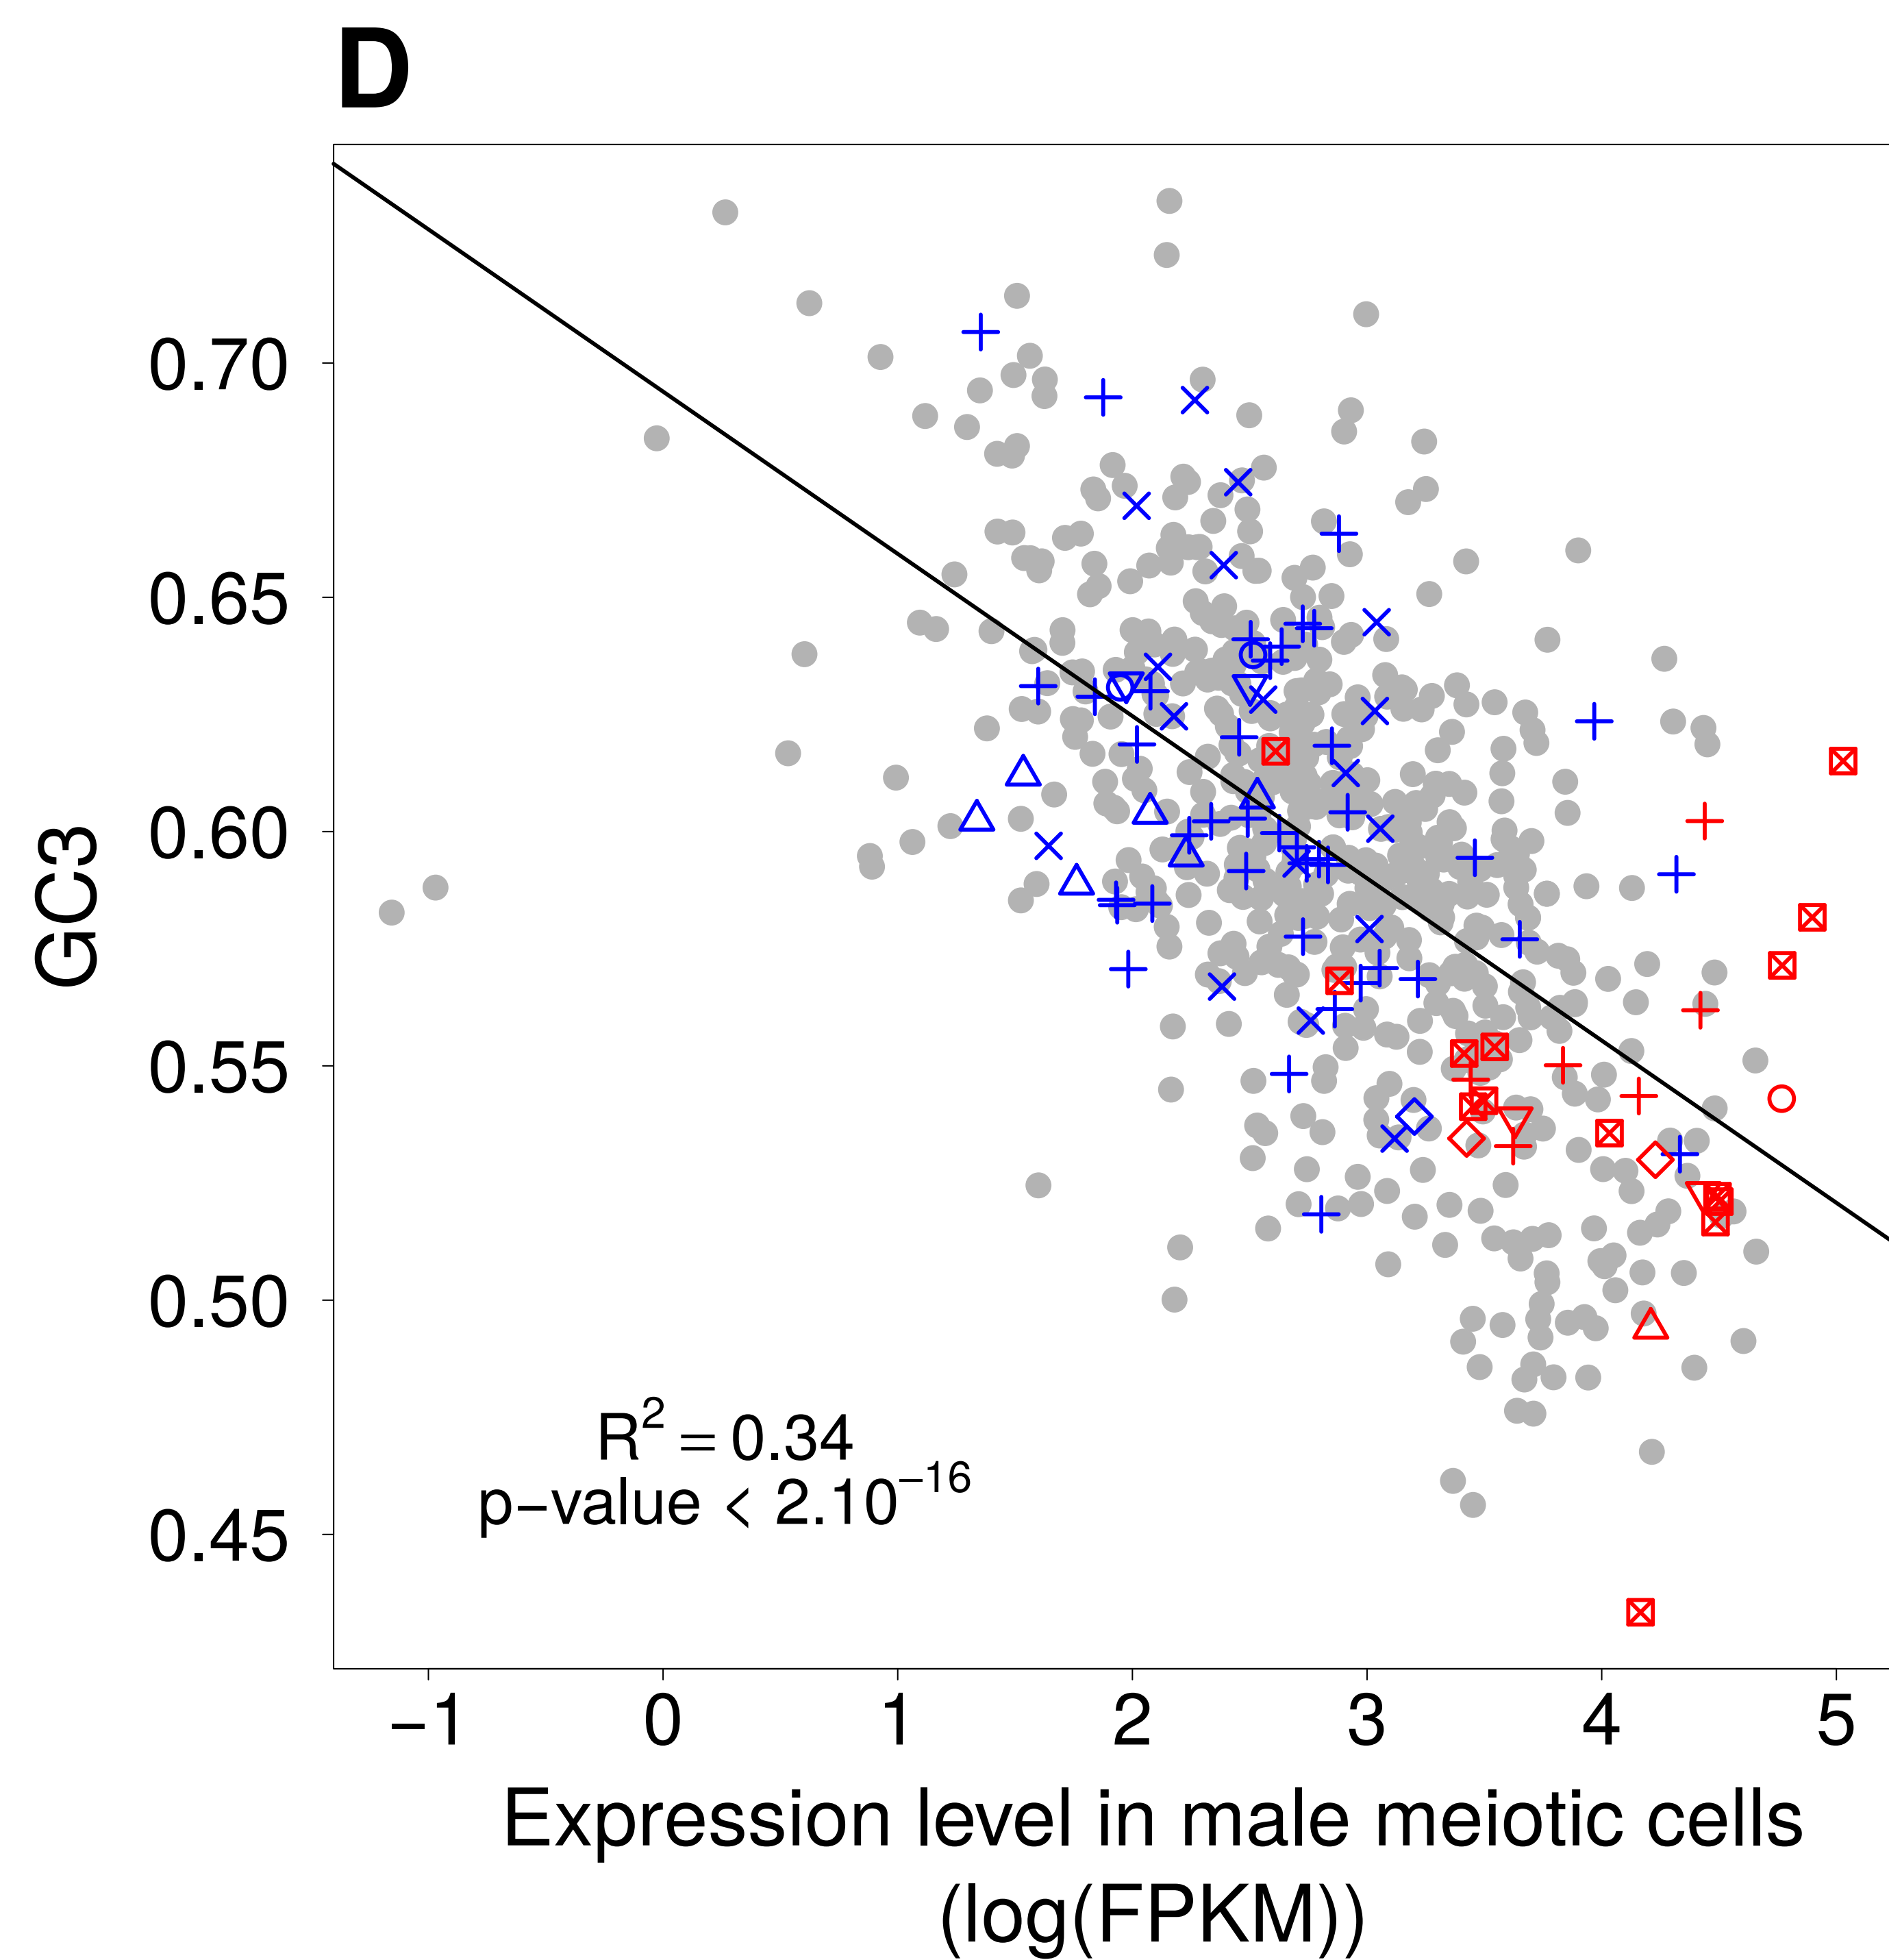

Supplement: supp [file elife-27344-supp-v1.zip]

**A**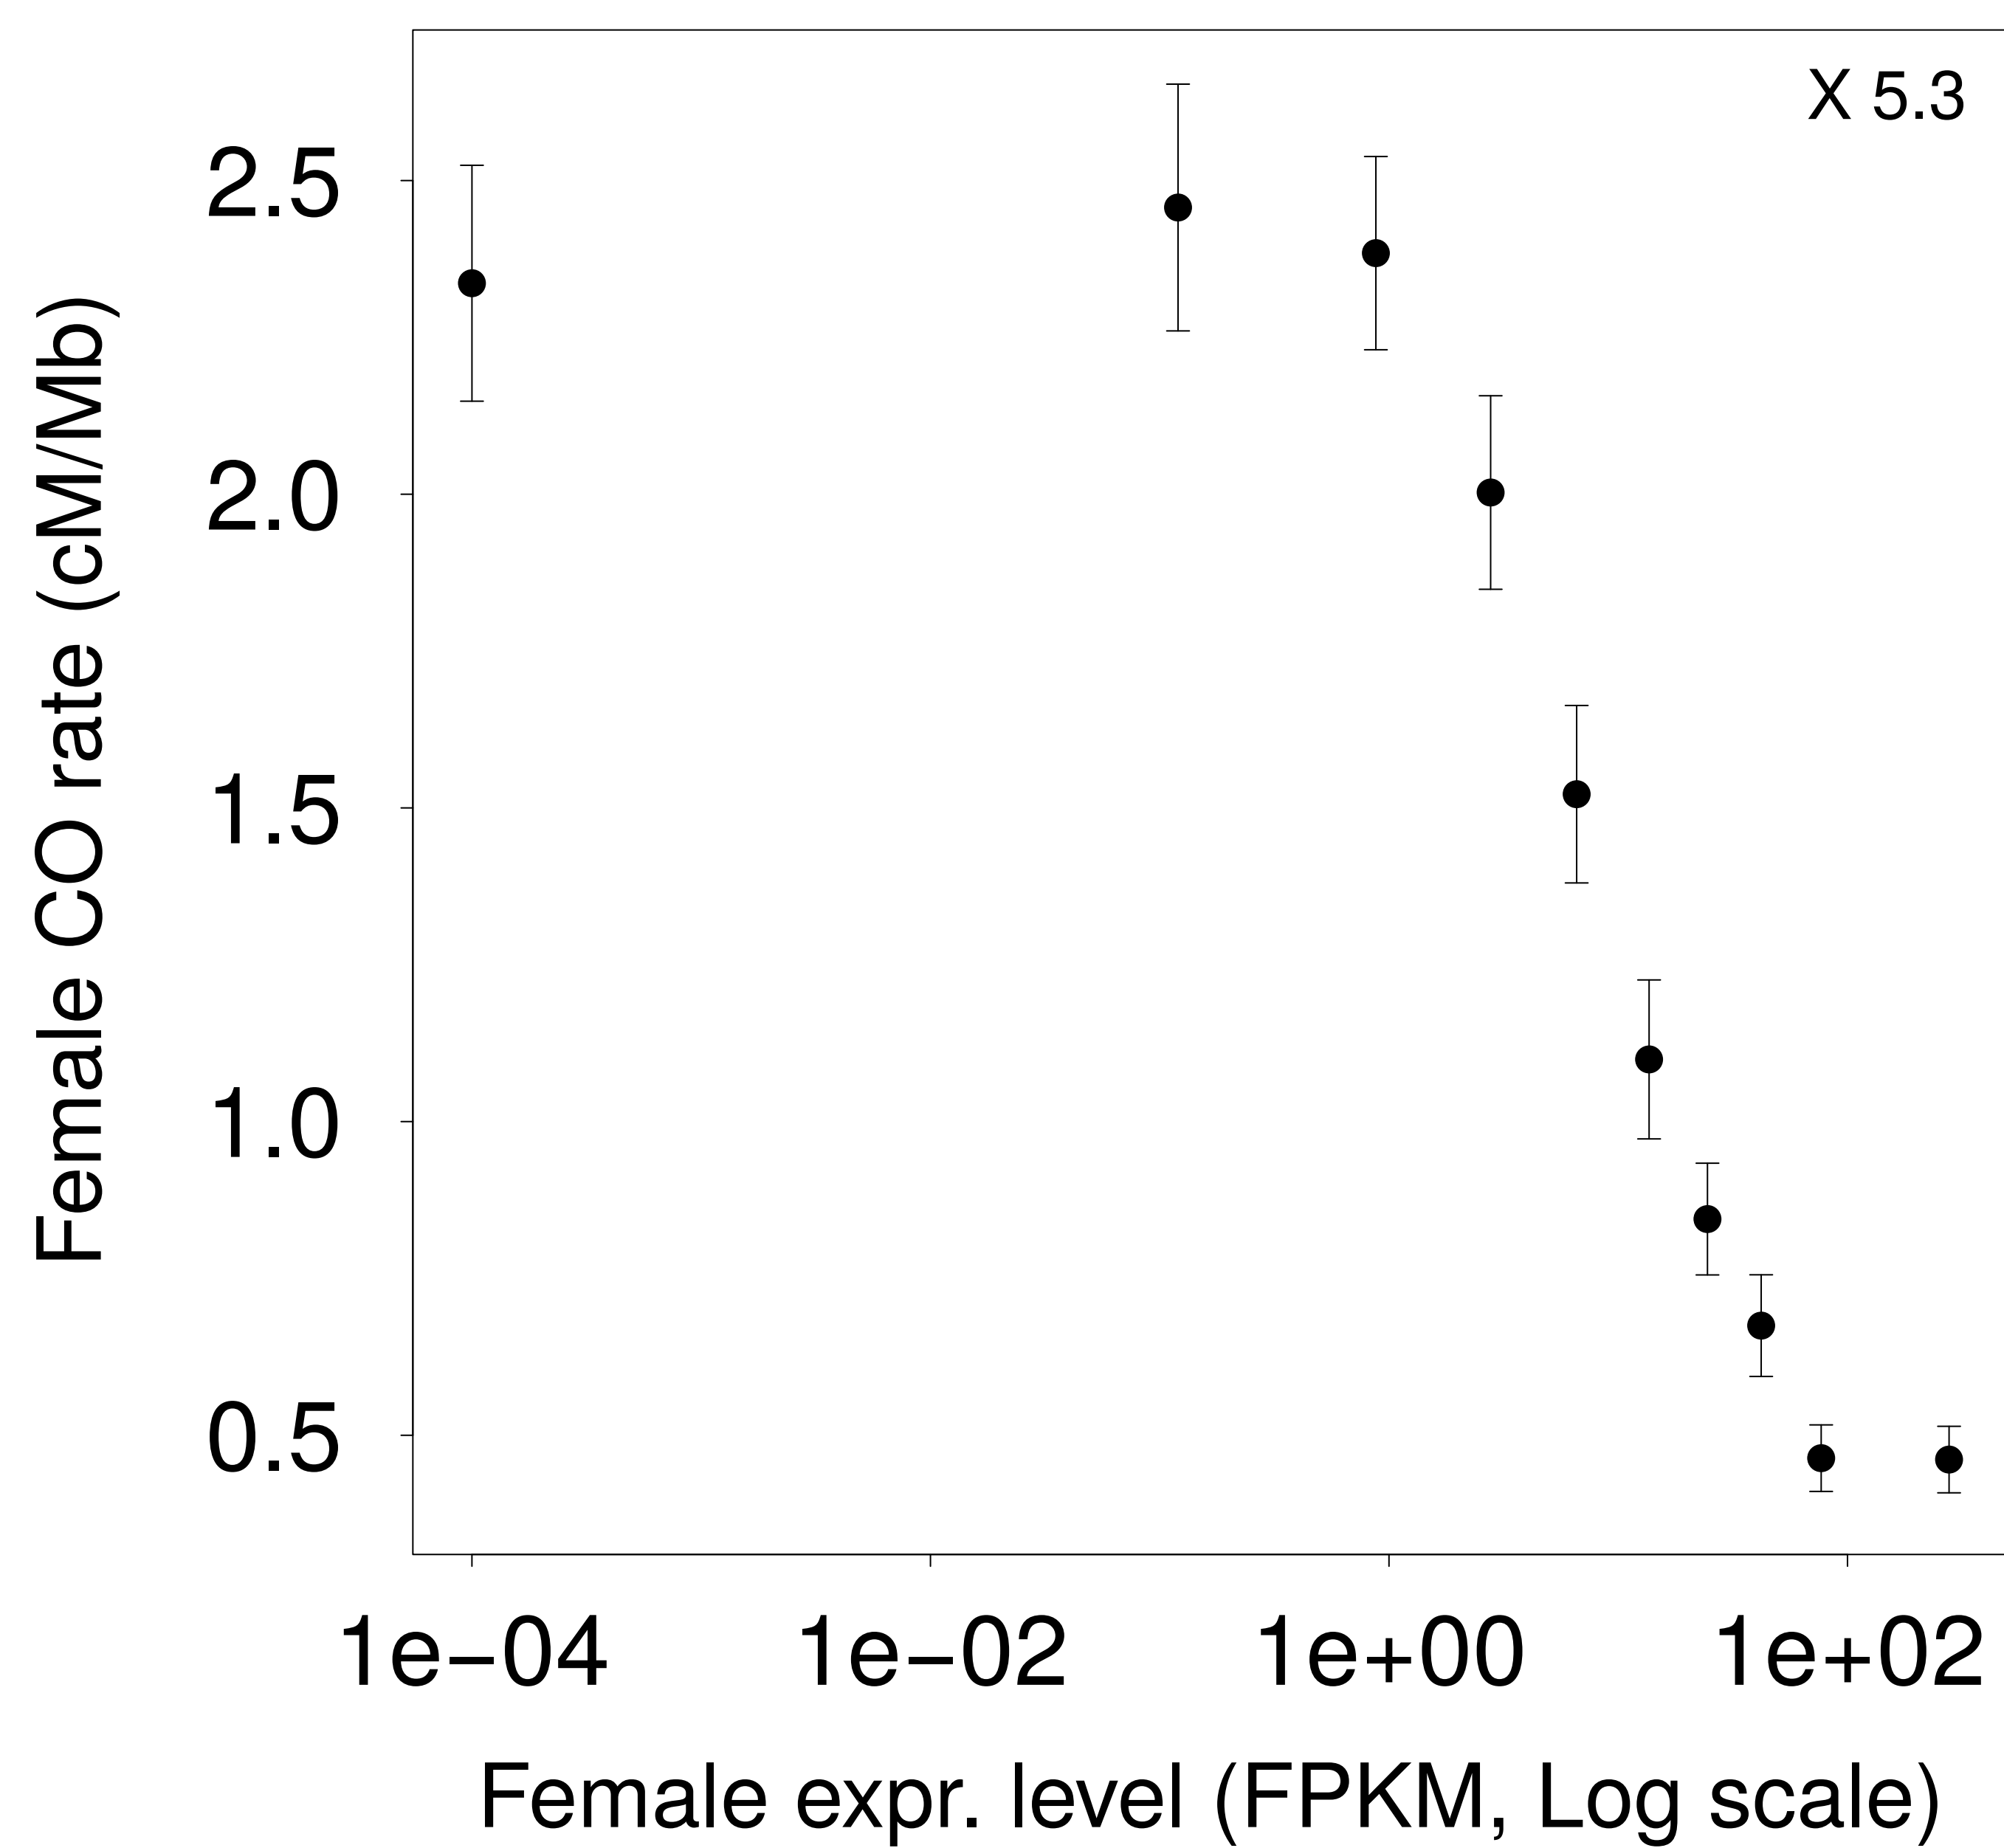**B**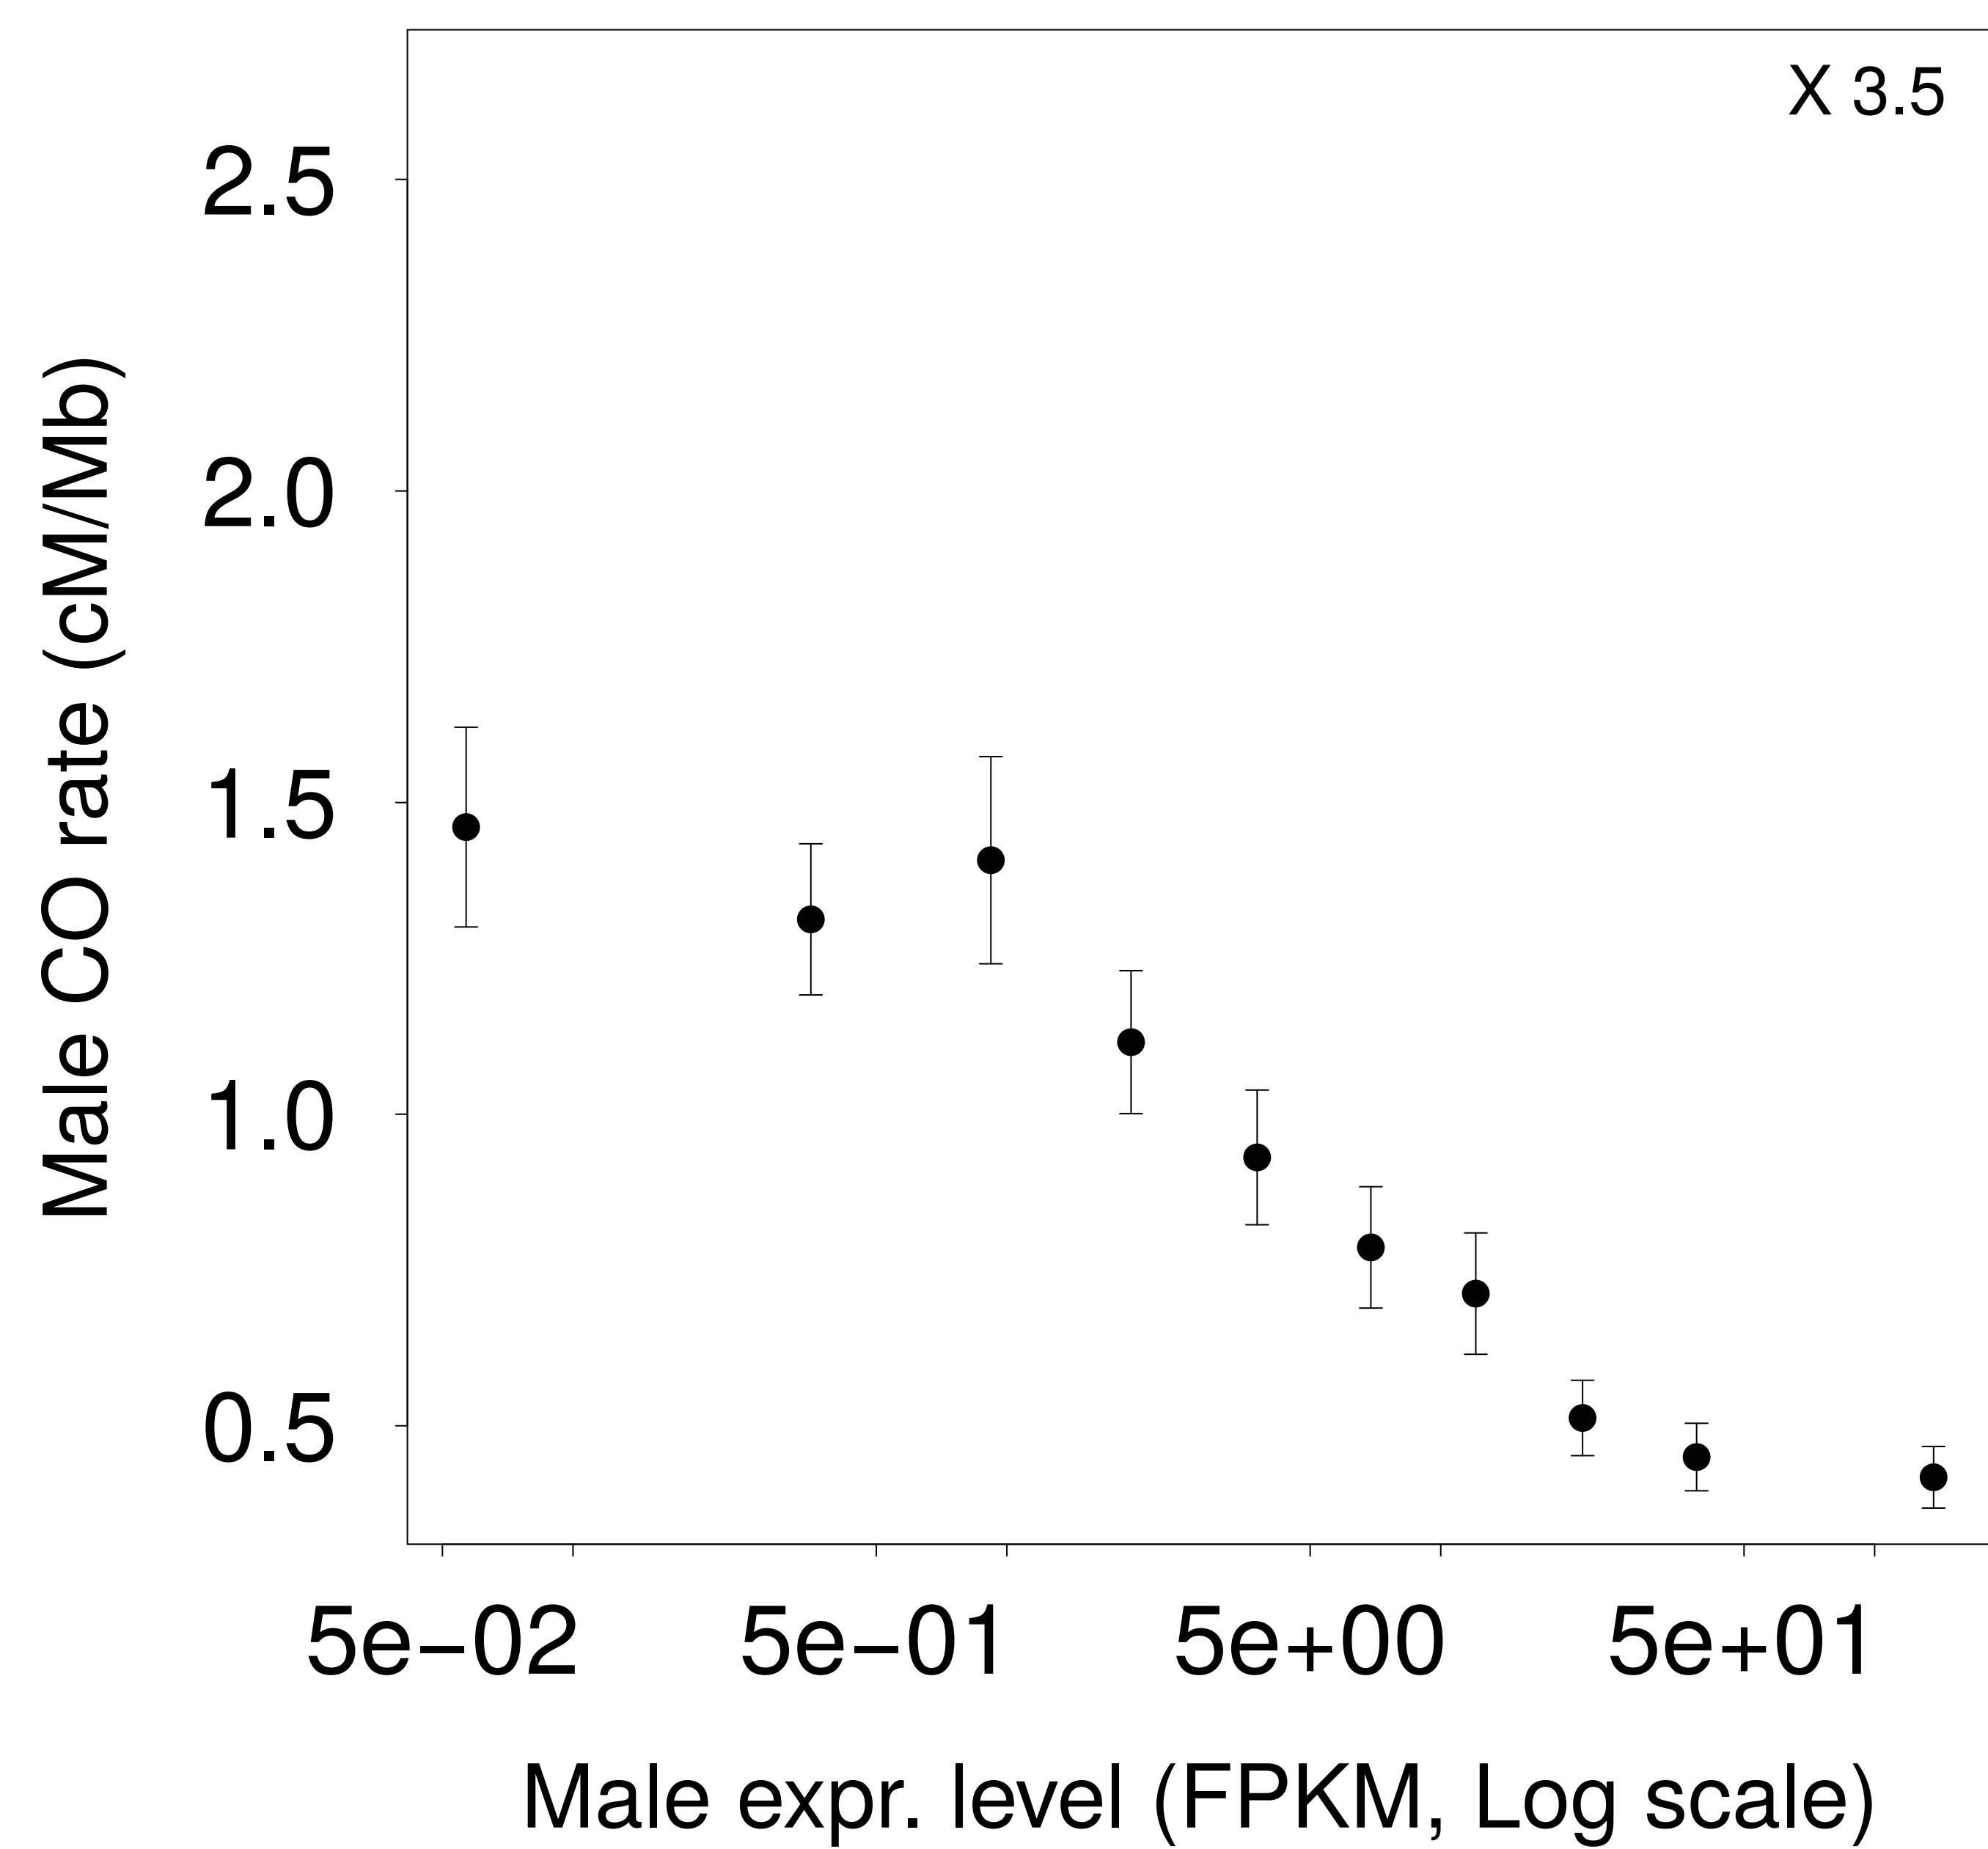**C**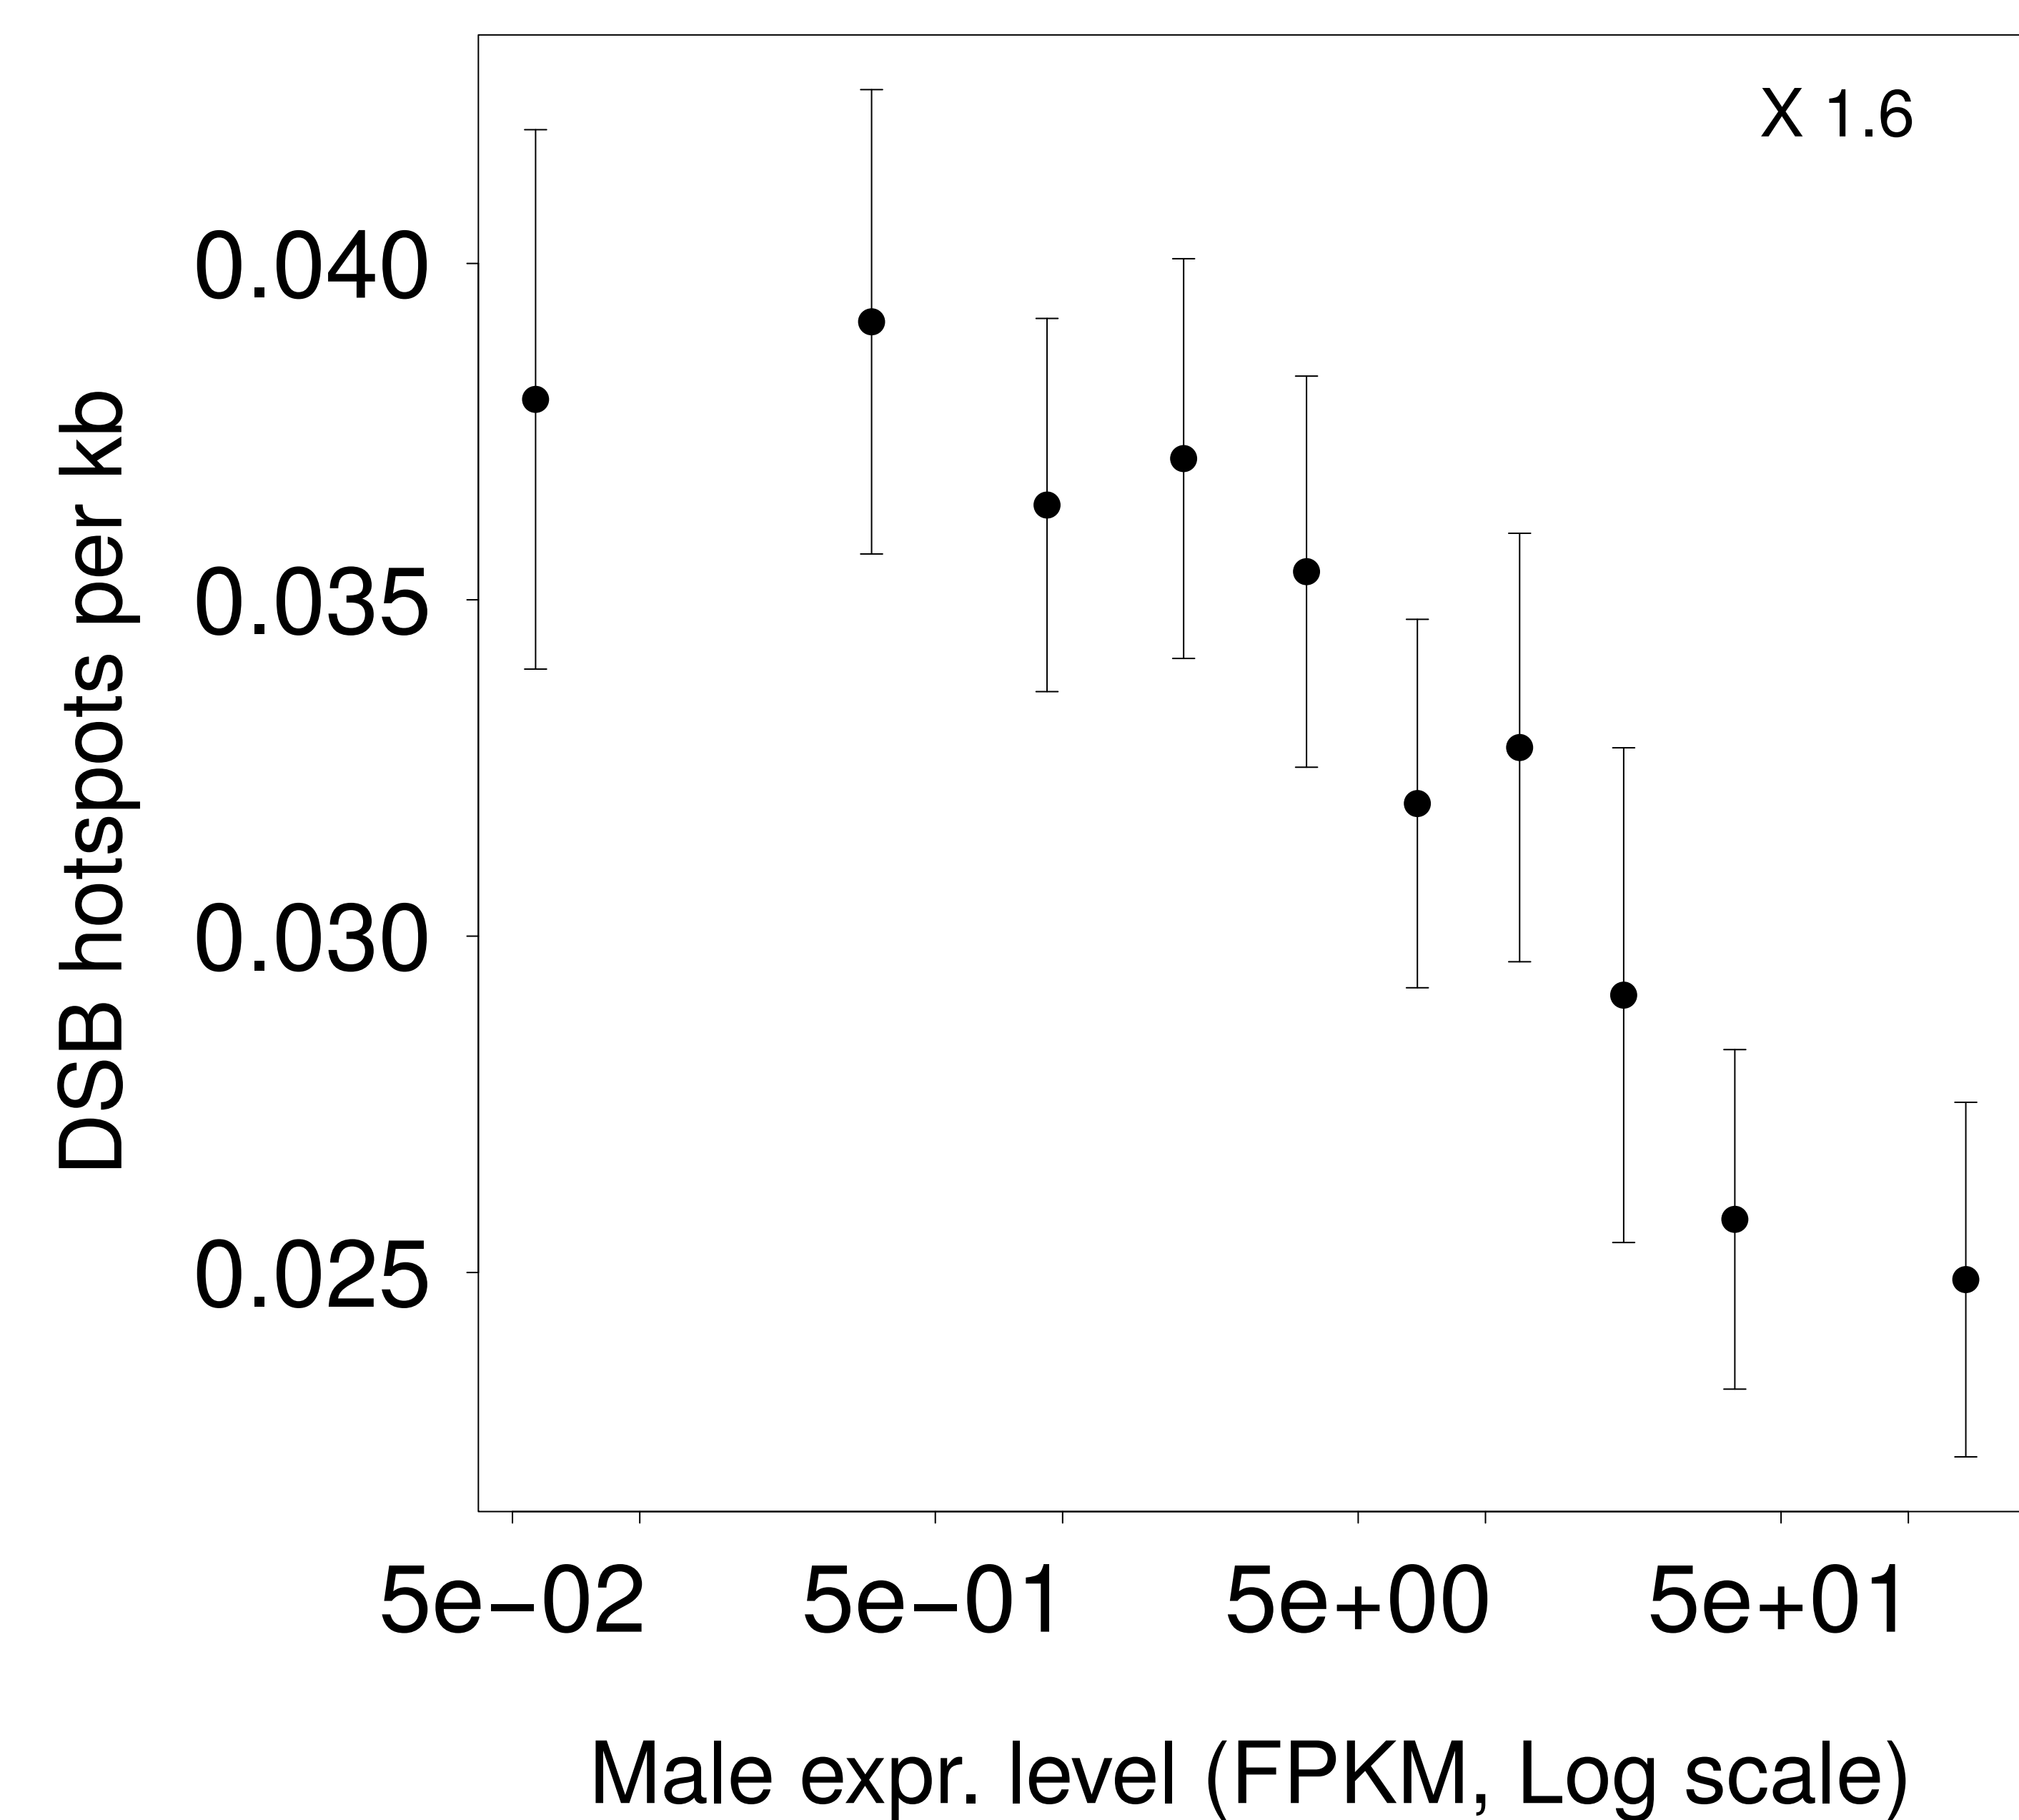

Supplement: supp [file elife-27344-supp-v1.zip]

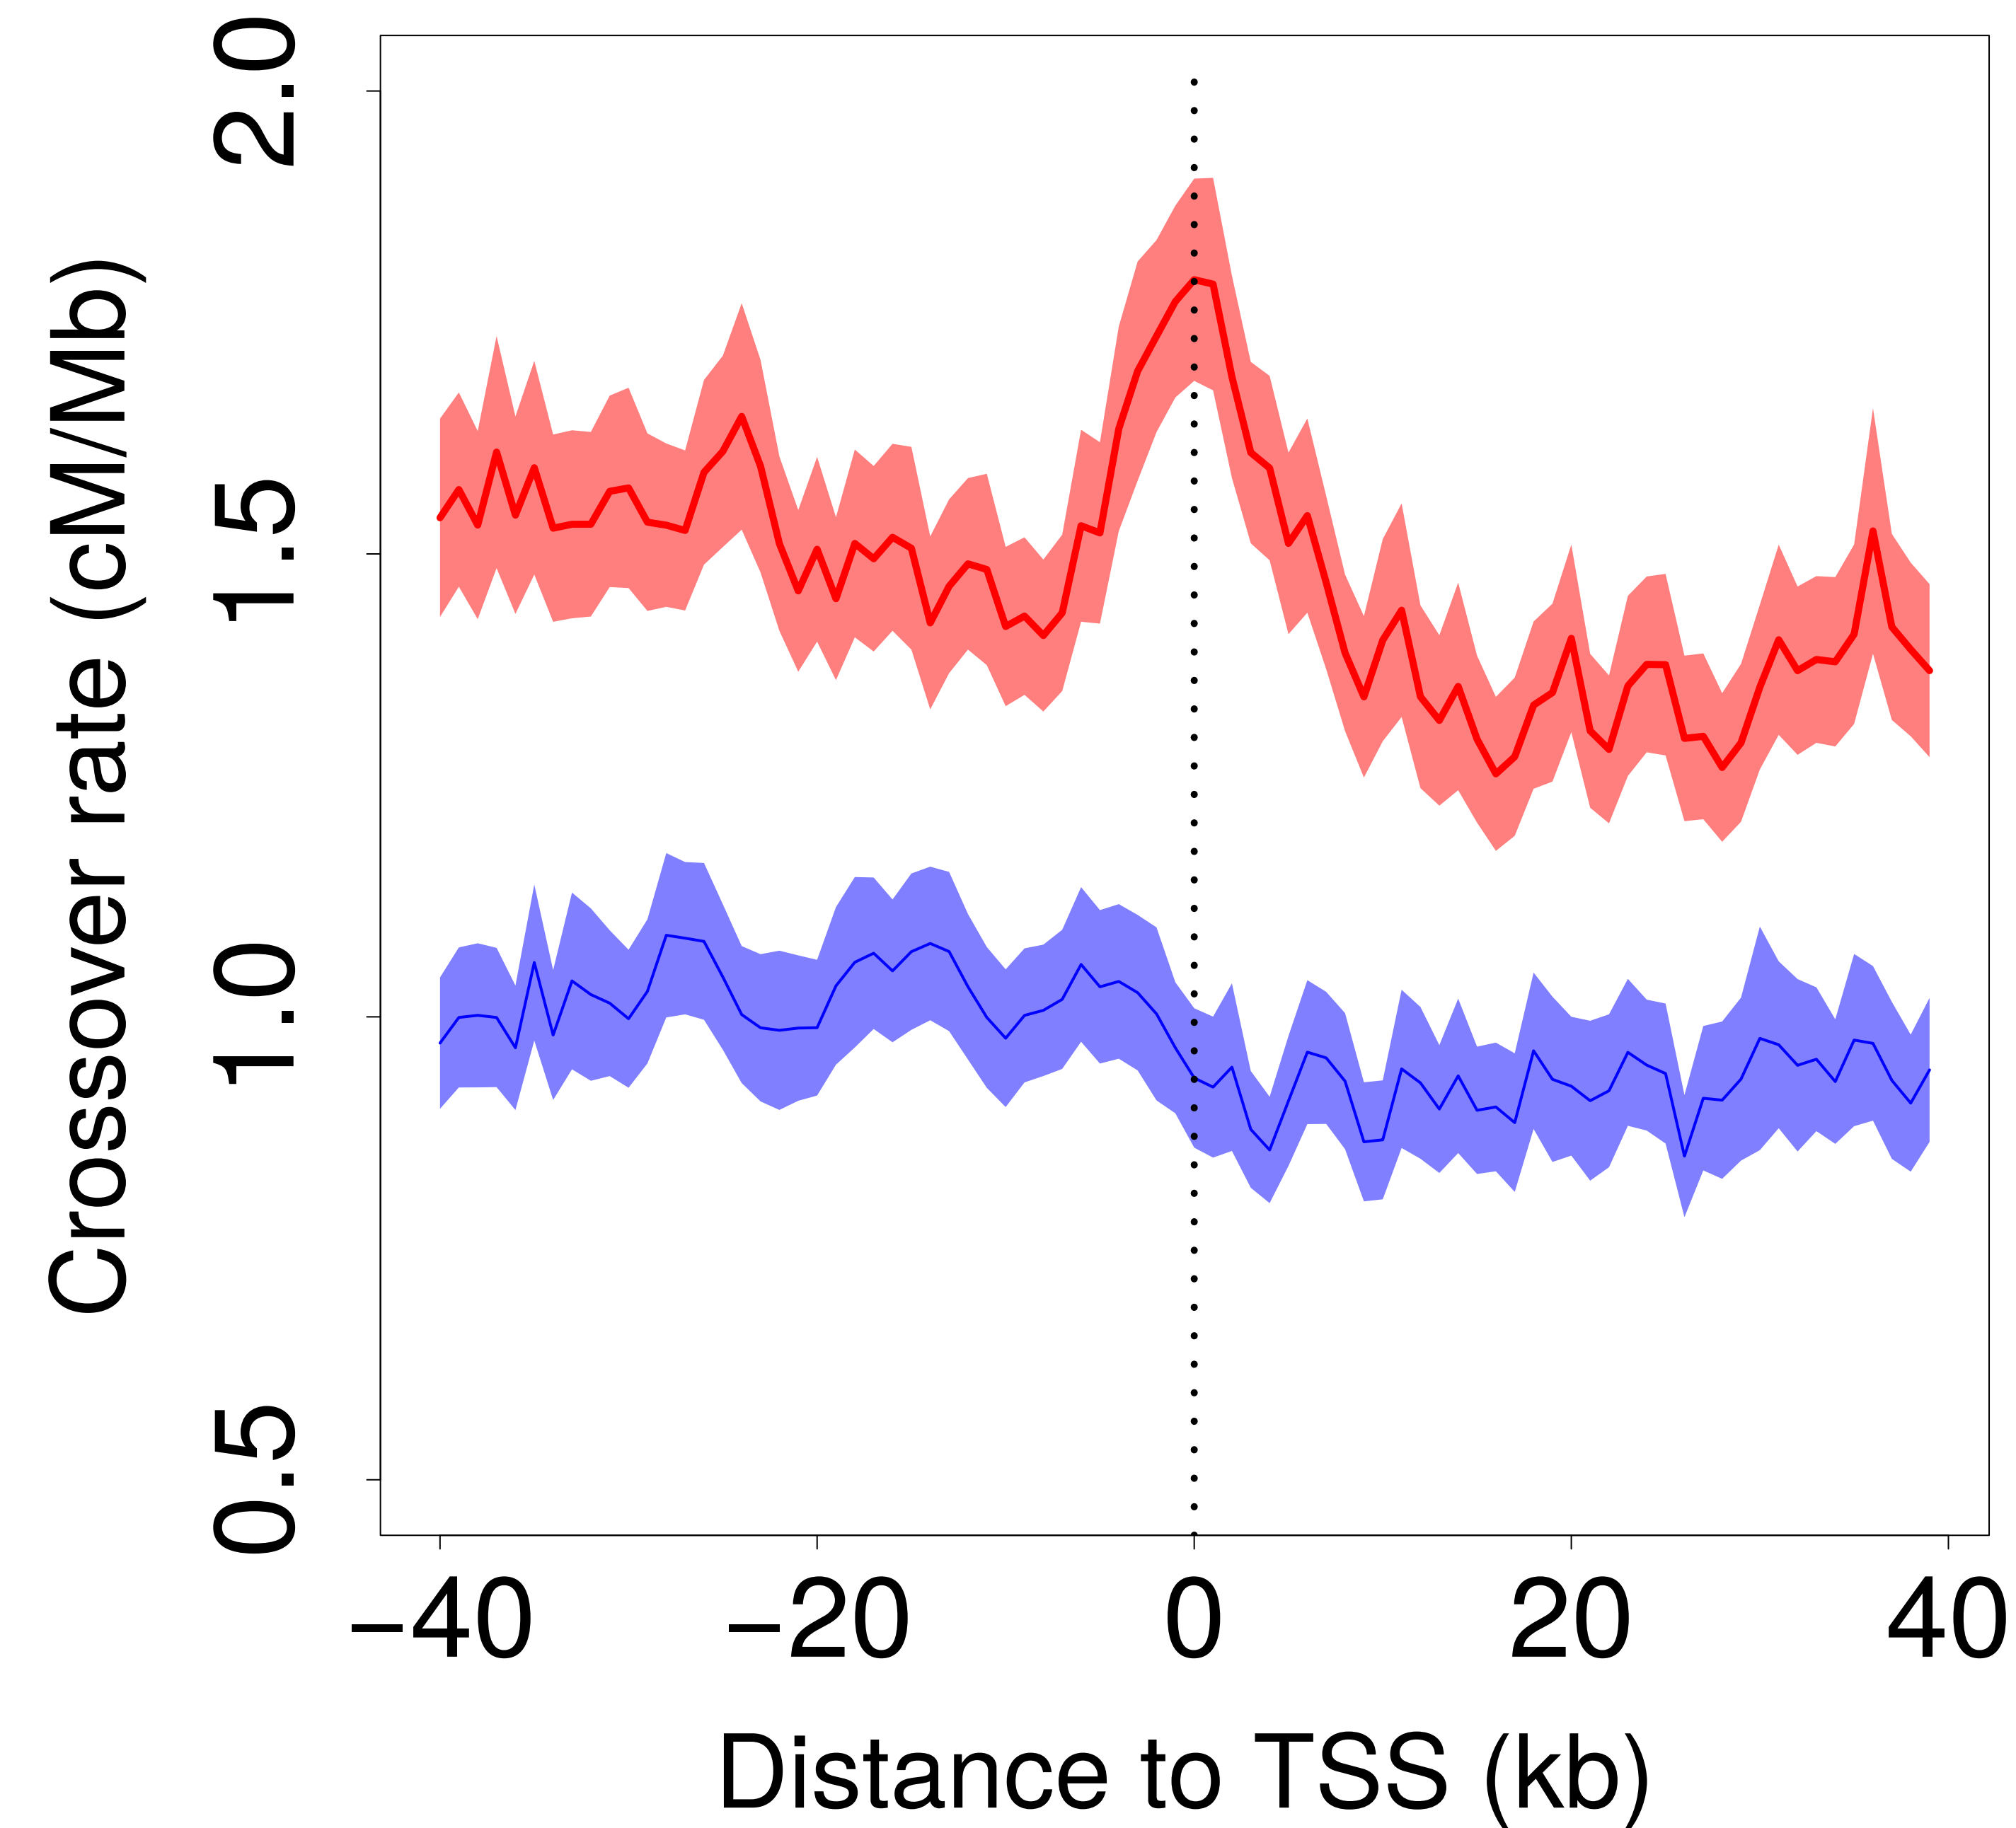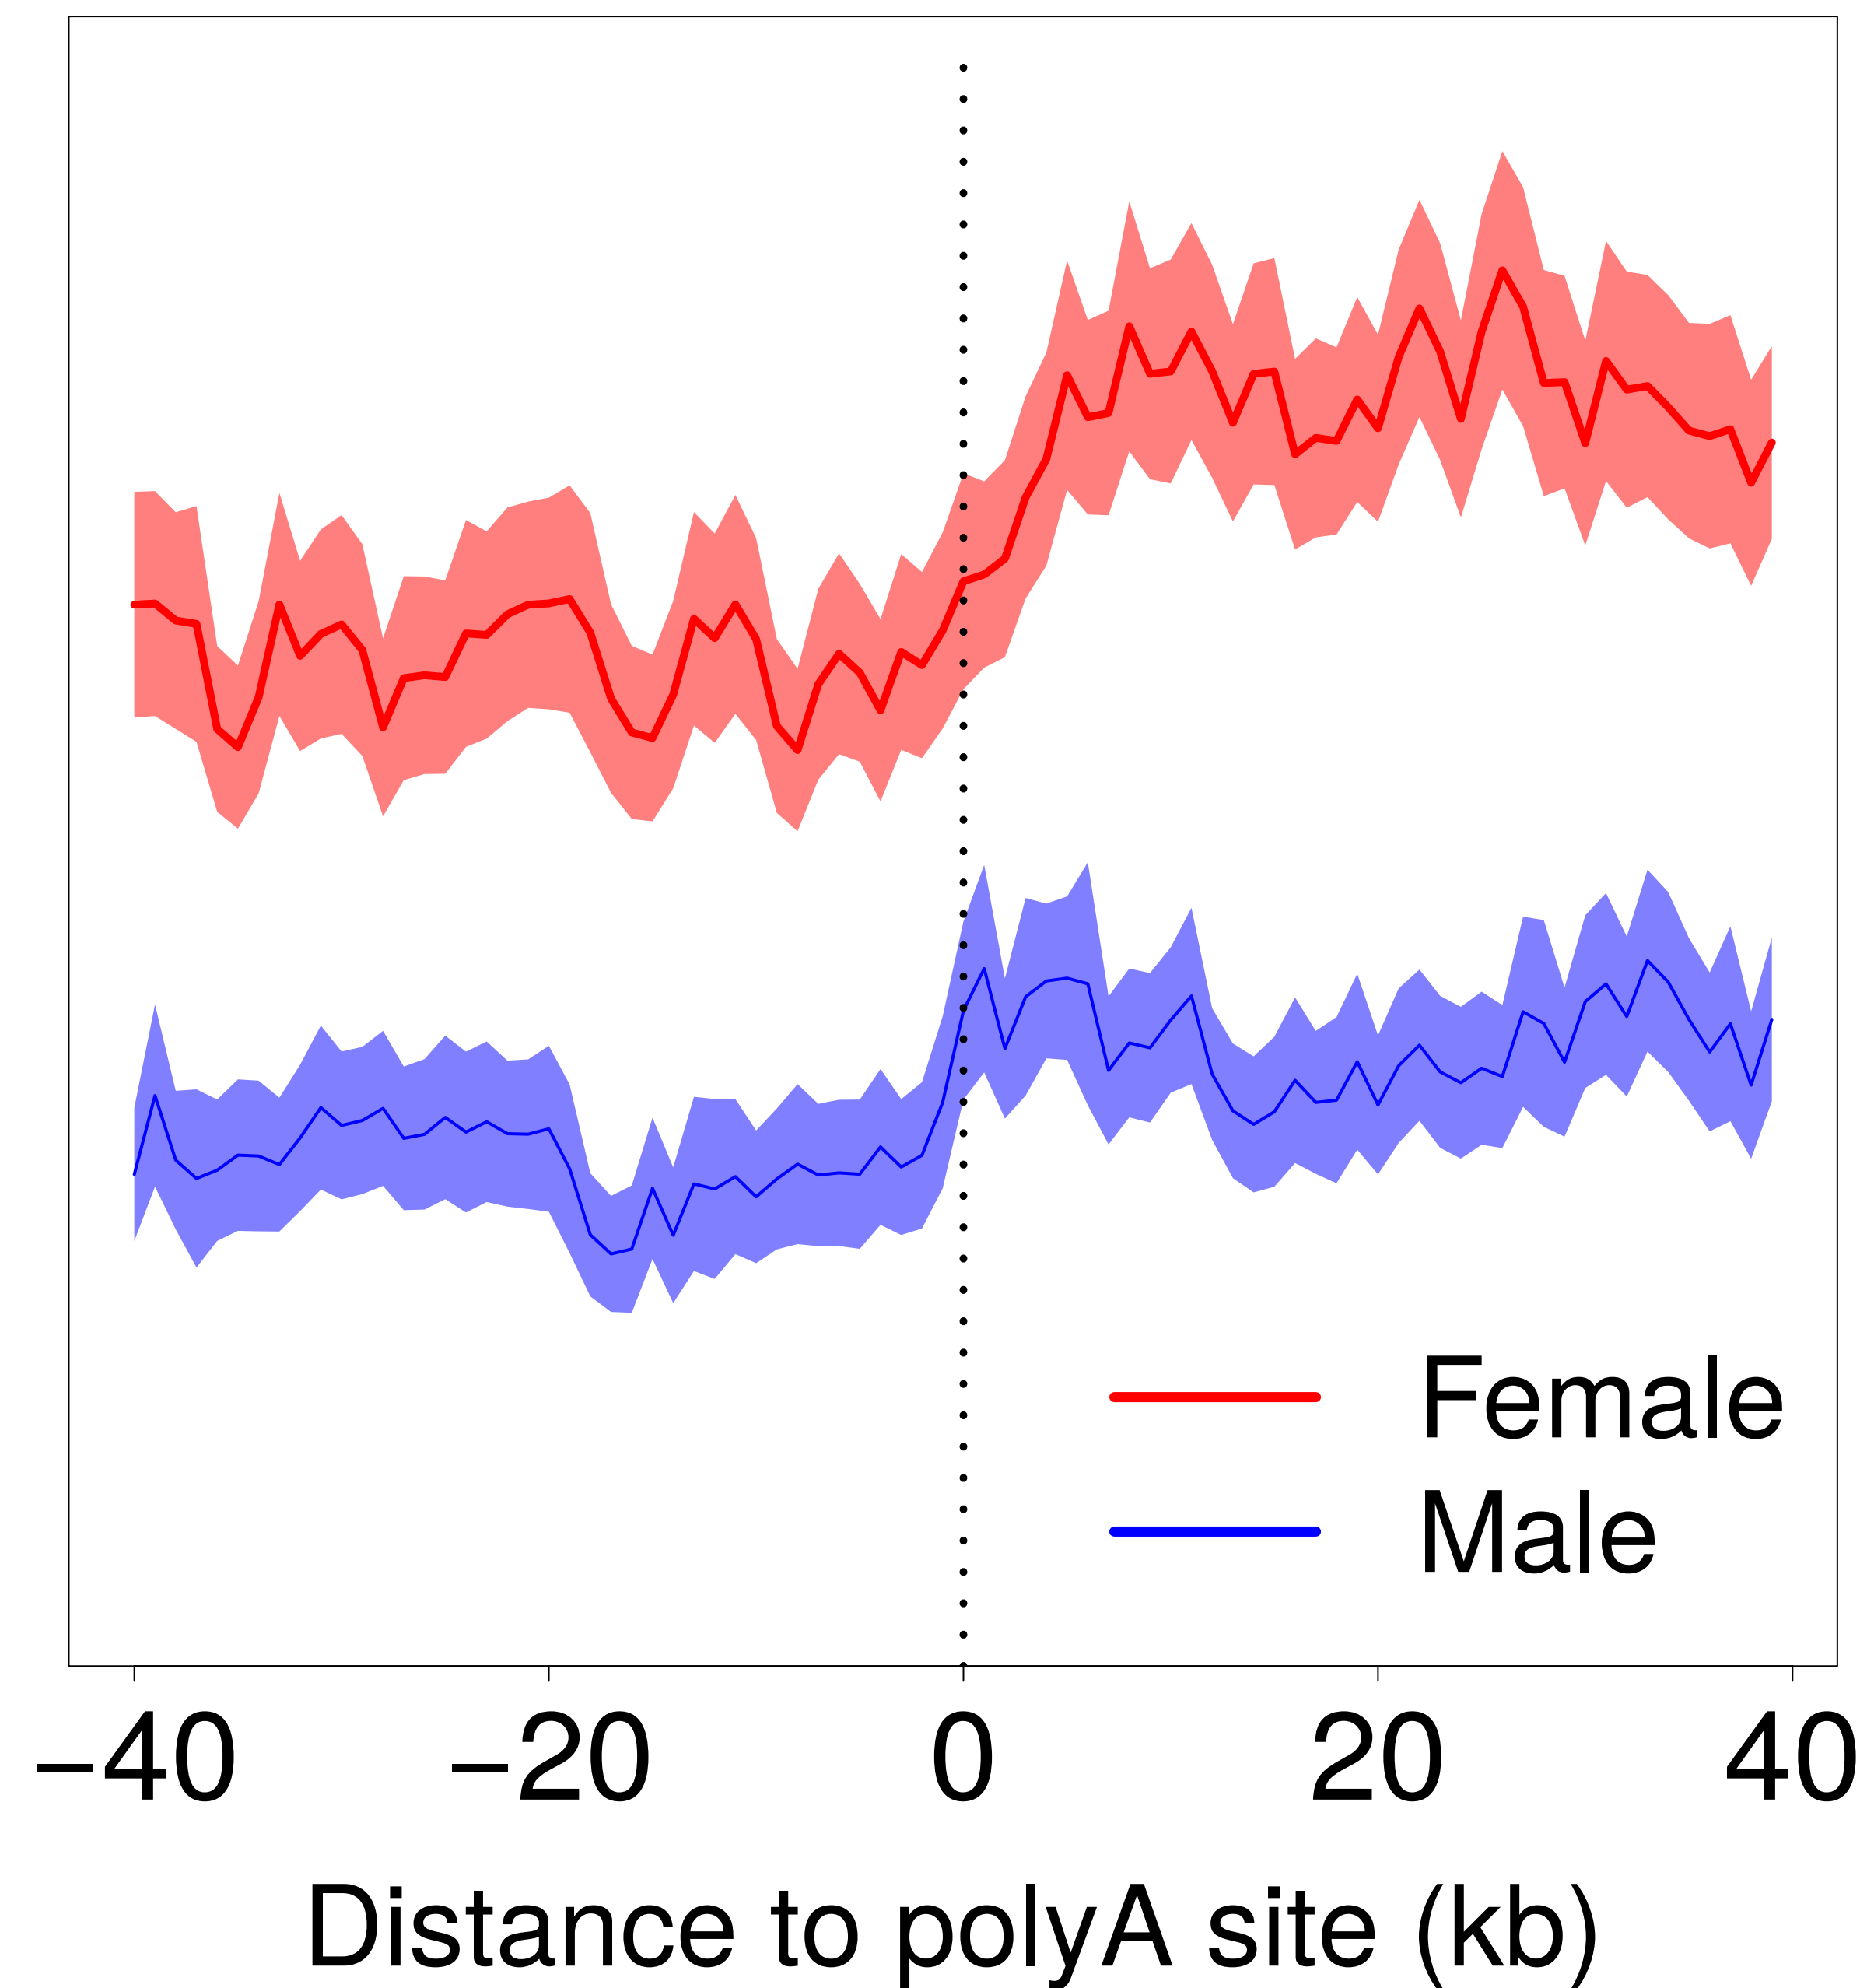

Supplement: supp [file elife-27344-supp-v1.zip]

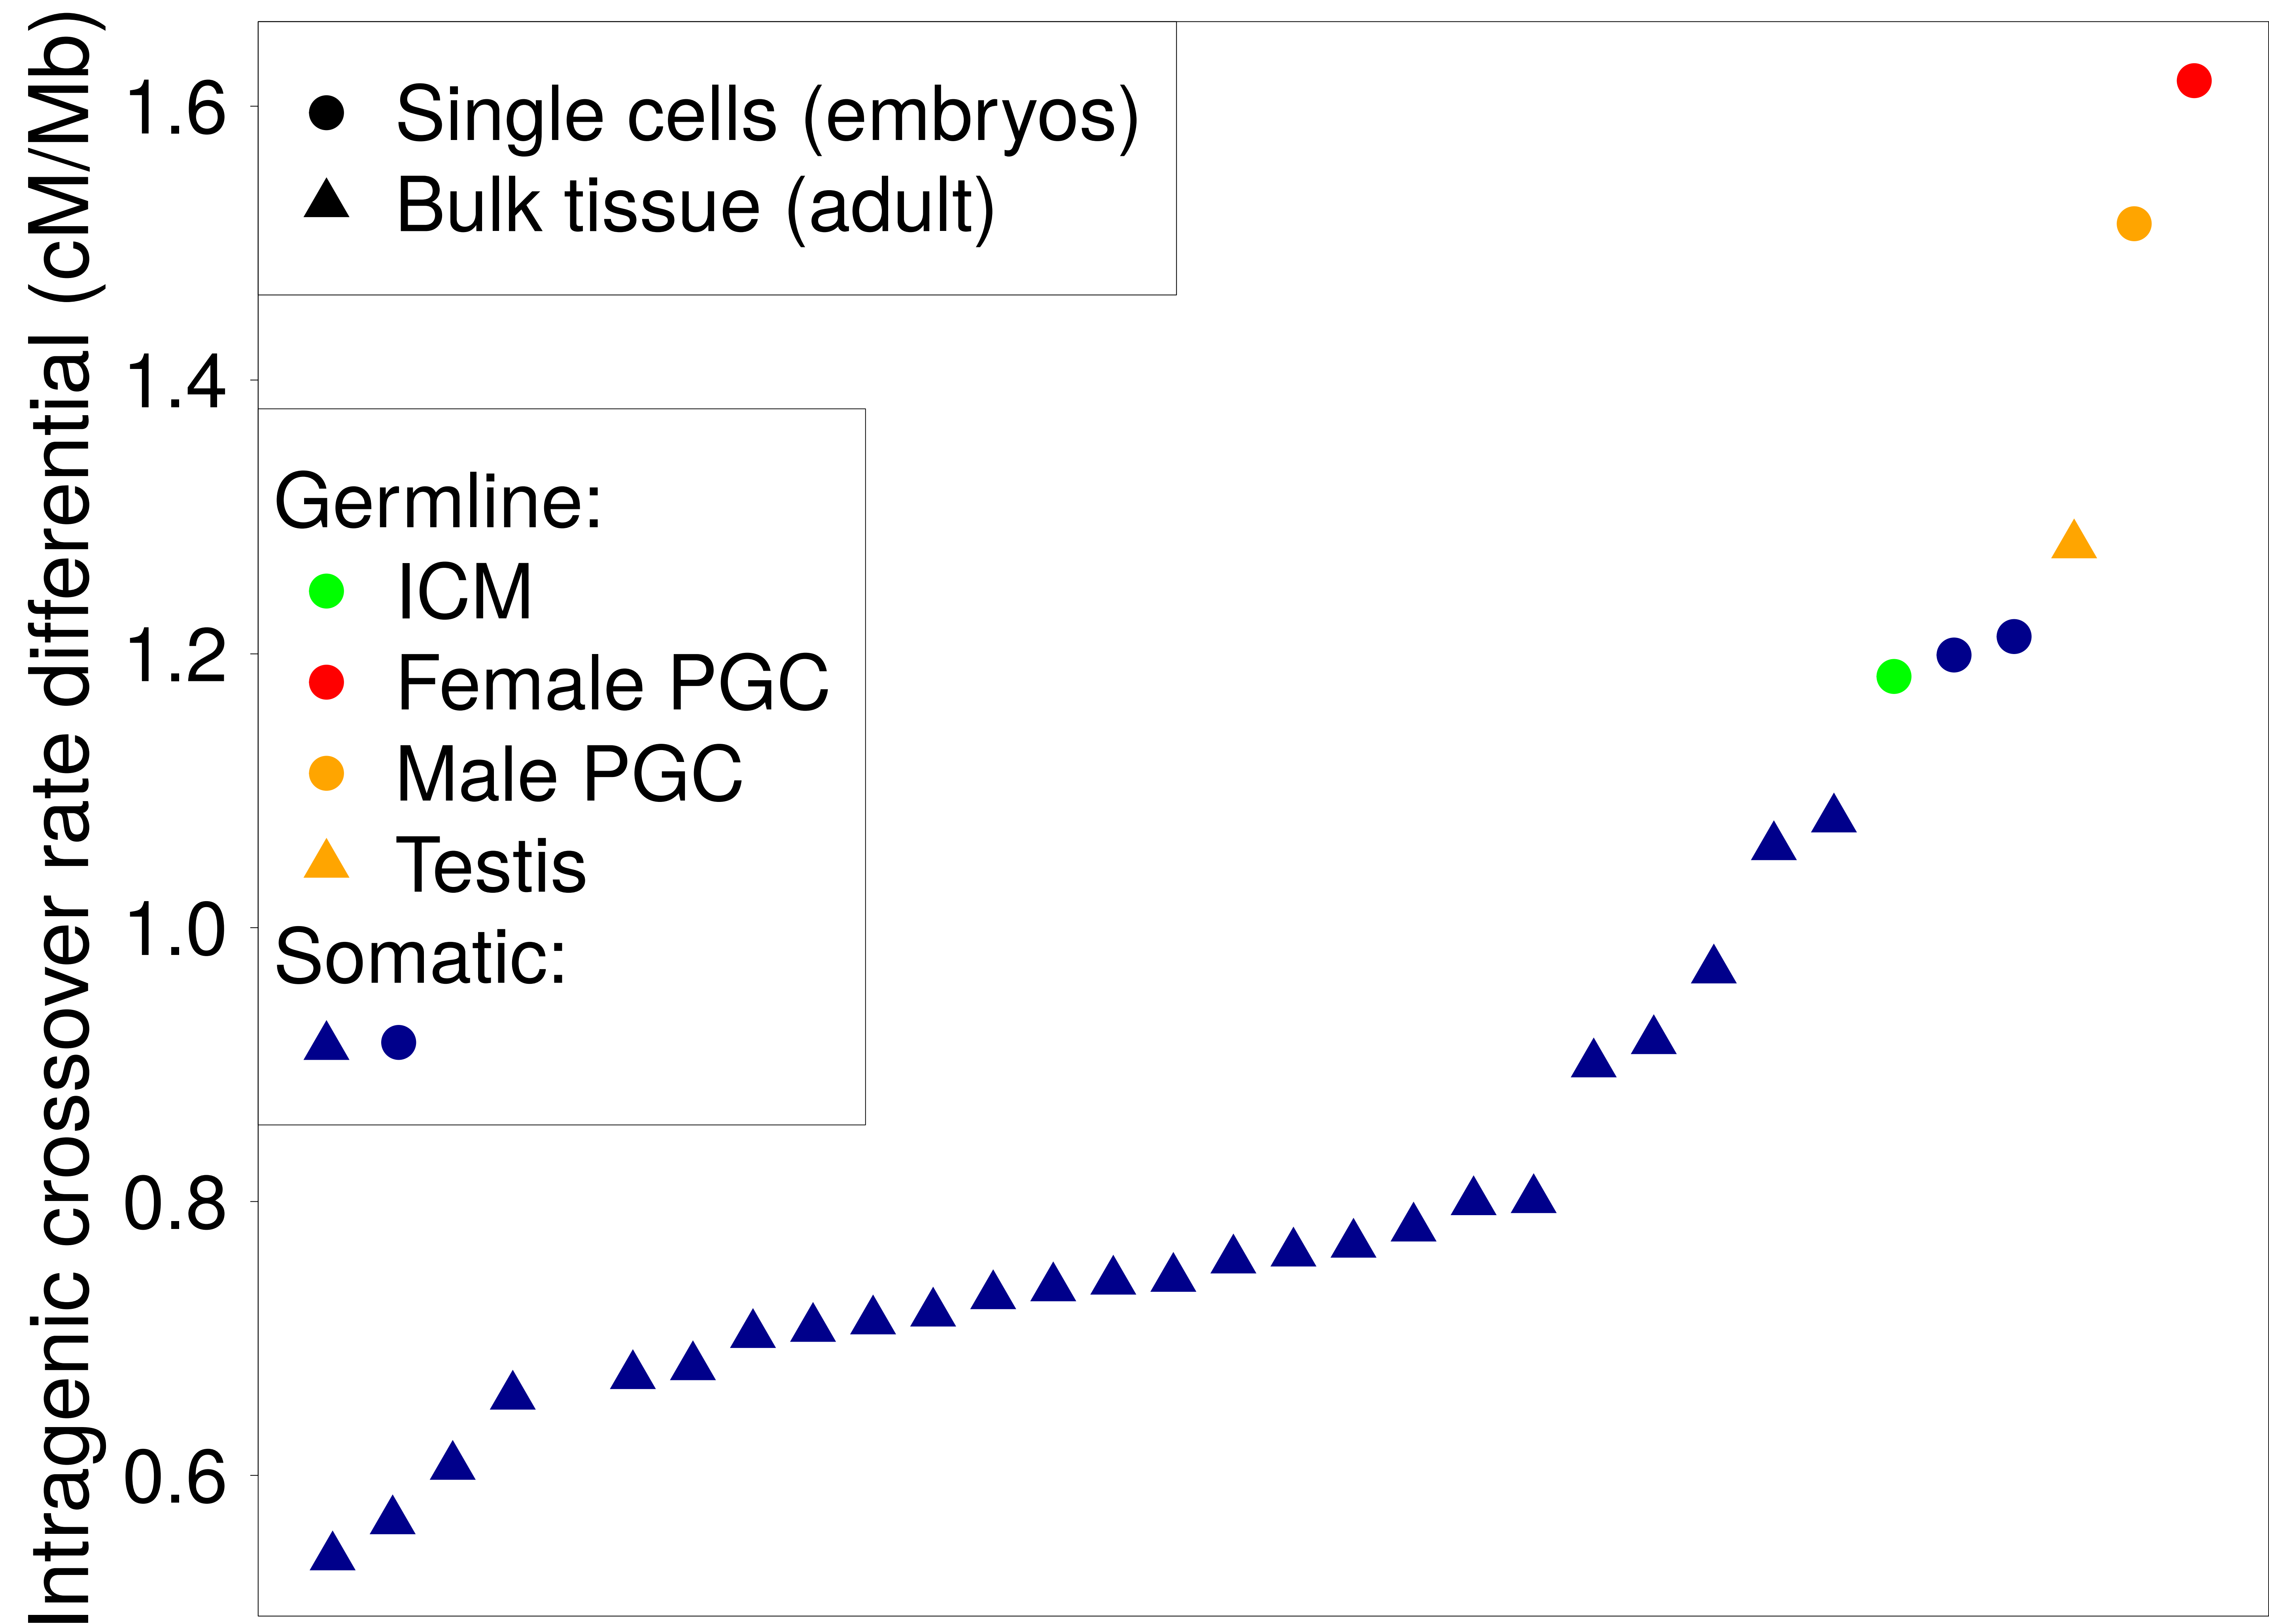

Supplement: supp [file elife-27344-supp-v1.zip]
